# Supplementary material for: Effects of Platycodins Folium on Depression in Mice Based on a UPLC-Q/TOF-MS Serum Assay and Hippocampus Metabolomics
Source: PubMed Central journal article supplement (PMC6540008; doi:10.3390/molecules24091712), 2019-05-02

## **Supplementary Materials I**

*Each BPI Chromatogram of Every Serum/Hippocampus Sample in  
Control/Model/HPF Group in ESI<sup>+</sup>/ESI<sup>-</sup> Mode*

## **Supplementary Materials II**

*MS Spectra of Each Potential Biomarker  
in Function 1 (Low Energy) and Function 2 (High Energy)*

## Supplementary Materials I

*Each BPI Chromatogram of Every Serum/Hippocampus Sample in  
Control/Model/HPF Group in ESI<sup>+</sup>/ESI<sup>-</sup> Mode*

1. In ESI<sup>+</sup> mode, each BPI chromatogram of every serum sample in normal control group (ESI<sup>+</sup>/ serum/ normal control group).
2. In ESI<sup>+</sup> mode, each BPI chromatogram of every serum sample in model group (ESI<sup>+</sup>/ serum/ model group).
3. In ESI<sup>+</sup> mode, each BPI chromatogram of every serum sample in HPF group (ESI<sup>+</sup>/ serum/ HPF group).
4. In ESI<sup>+</sup> mode, each BPI chromatogram of every hippocampus sample in normal control group (ESI<sup>+</sup>/ hip/ normal control group).
5. In ESI<sup>+</sup> mode, each BPI chromatogram of every hippocampus sample in model group (ESI<sup>+</sup>/ hip/ model group).
6. In ESI<sup>+</sup> mode, each BPI chromatogram of every hippocampus sample in HPF group (ESI<sup>+</sup>/ hip/ HPF group).
7. In ESI<sup>-</sup> mode, each BPI chromatogram of every serum sample in normal control group (ESI<sup>-</sup>/ serum/ normal control group).
8. In ESI<sup>-</sup> mode, each BPI chromatogram of every serum sample in model group (ESI<sup>-</sup>/ serum/ model group).
9. In ESI<sup>-</sup> mode, each BPI chromatogram of every serum sample in HPF group (ESI<sup>-</sup>/ serum/ HPF group).

10. In ESI<sup>-</sup> mode, each BPI chromatogram of every hippocampus sample in normal control group (ESI<sup>-</sup>/ hip/ normal control group).
11. In ESI<sup>-</sup> mode, each BPI chromatogram of every hippocampus sample in model group (ESI<sup>-</sup>/ hip/ model group).
12. In ESI<sup>-</sup> mode, each BPI chromatogram of every hippocampus sample in HPF group (ESI<sup>-</sup>/ hip/ HPF group).

# 1. ESI+/ serum/ normal control group

wcz\_blood\_blank\_1\_pos

1: TOF MS ES+  
BPI  
2.17e7

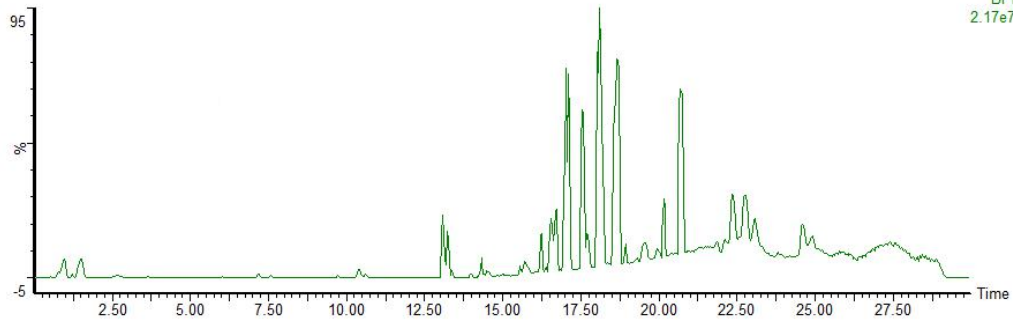

wcz\_blood\_blank\_2\_pos

1: TOF MS ES+  
BPI  
2.02e7

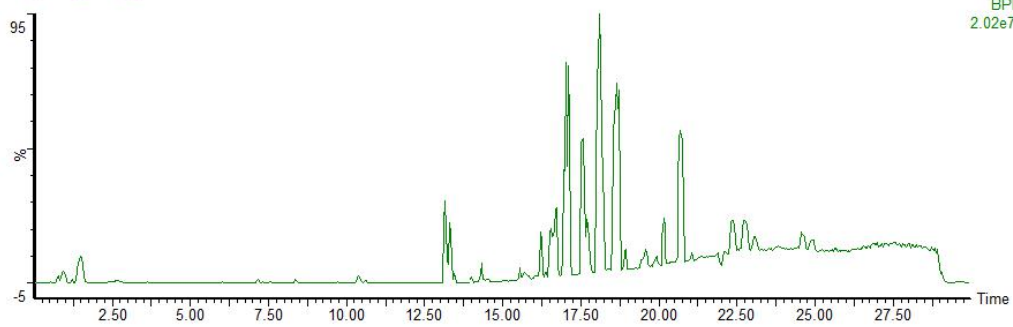

wcz\_blood\_blank\_3\_pos

1: TOF MS ES+  
BPI  
2.06e7

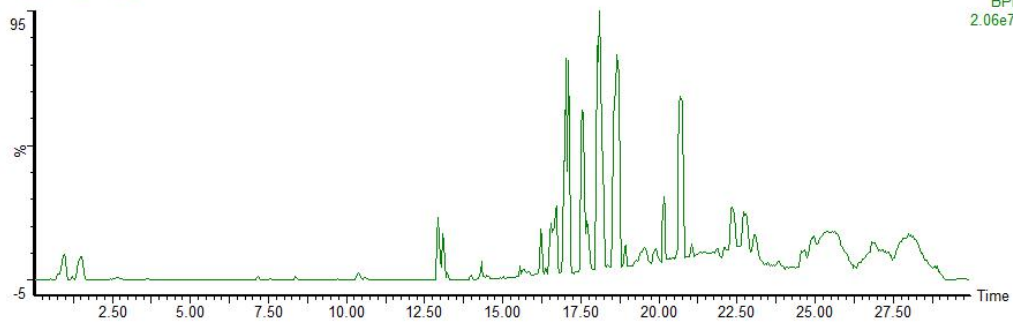

wcz\_blood\_blank\_4\_pos

1: TOF MS ES+  
BPI  
2.03e7

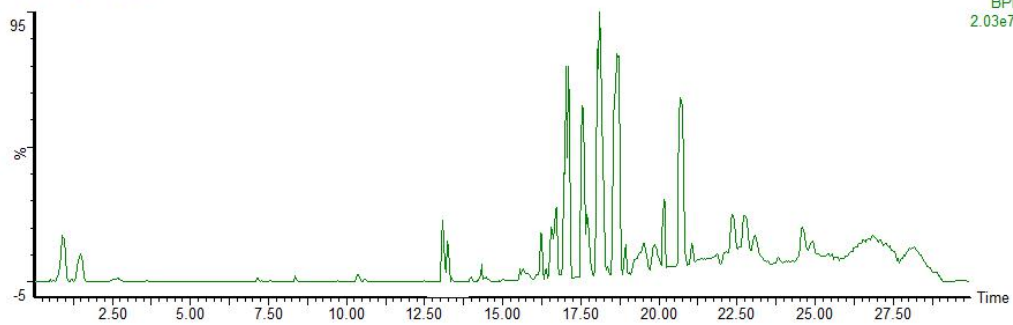

wcz\_blood\_blank\_5\_pos

1: TOF MS ES+  
BPI  
2.13e7

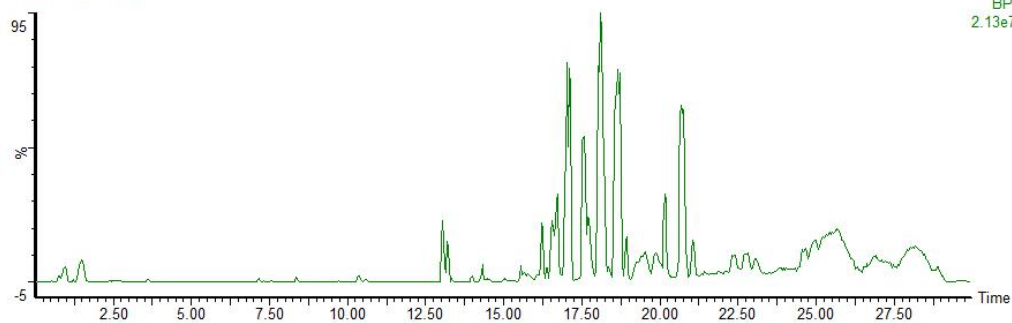

wcz\_blood\_blank\_6\_pos

1: TOF MS ES+  
BPI  
2.07e7

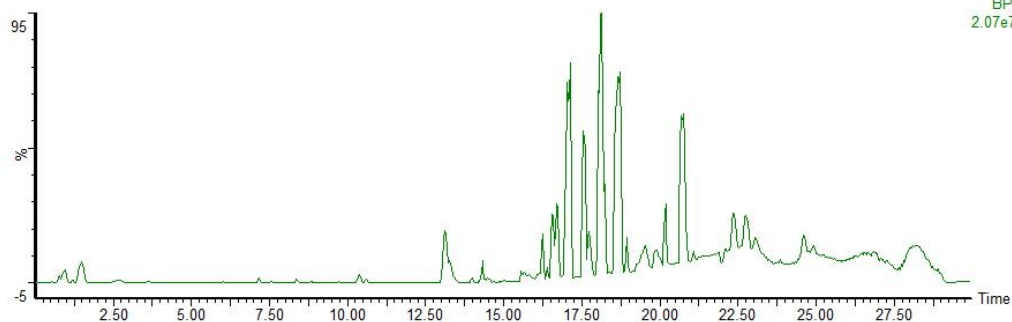

wcz\_blood\_blank\_7\_pos

1: TOF MS ES+  
BPI  
2.02e7

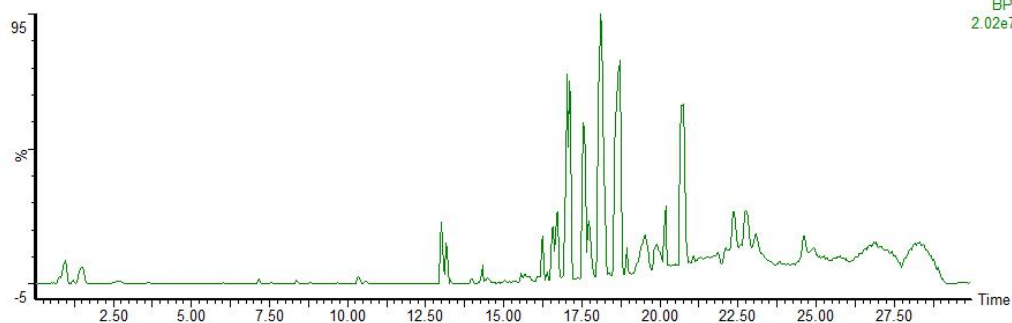

wcz\_blood\_blank\_8\_pos

1: TOF MS ES+  
BPI  
1.96e7

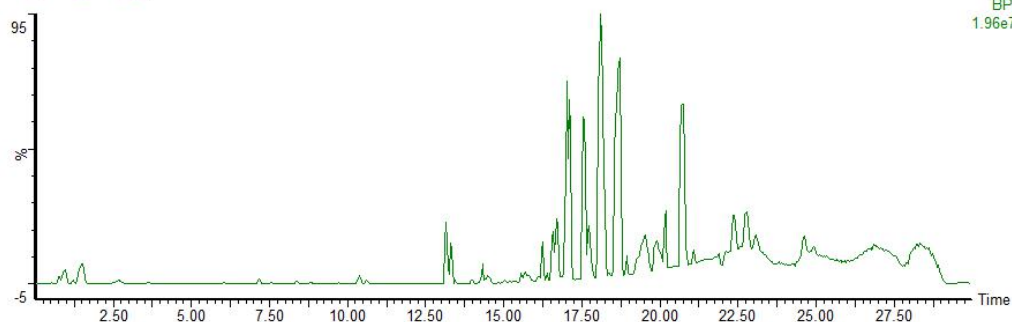

## 2. ESI+/ serum/ model group

wcz\_blood\_model\_1\_pos

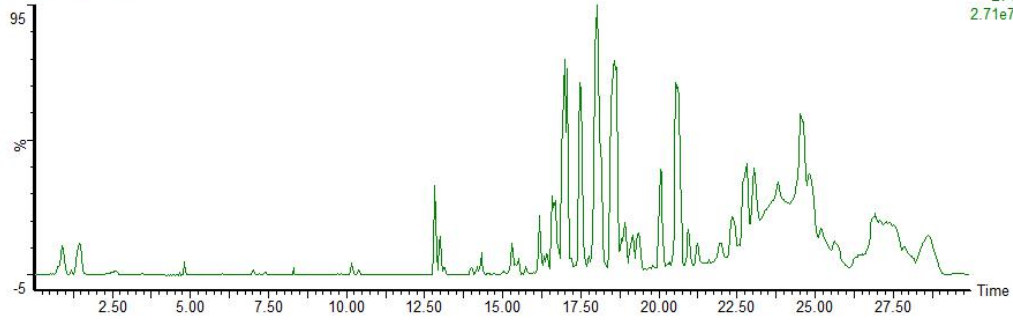

wcz\_blood\_model\_2\_pos

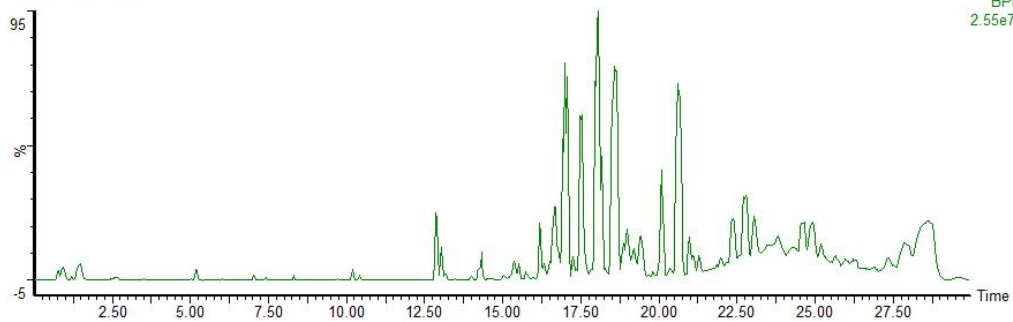

wcz\_blood\_model\_3\_pos

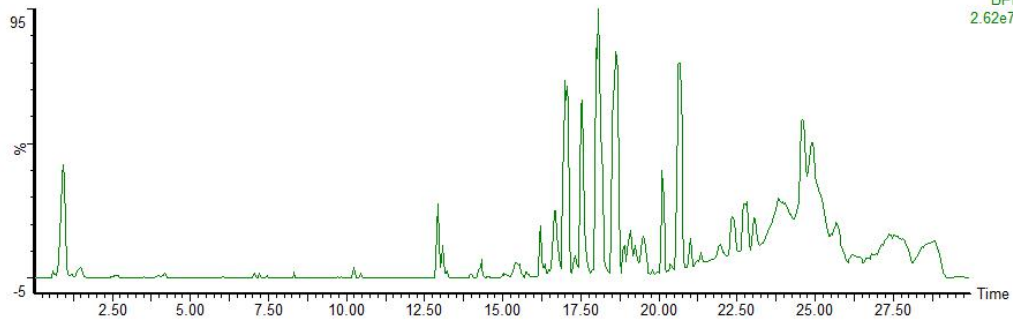

wcz\_blood\_model\_4\_pos

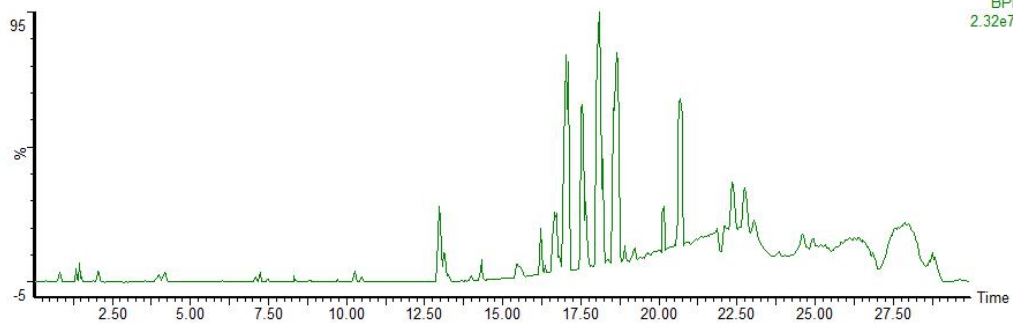

wcz\_blood\_model\_5\_pos

1: TOF MS ES+  
BPI  
2.30e7

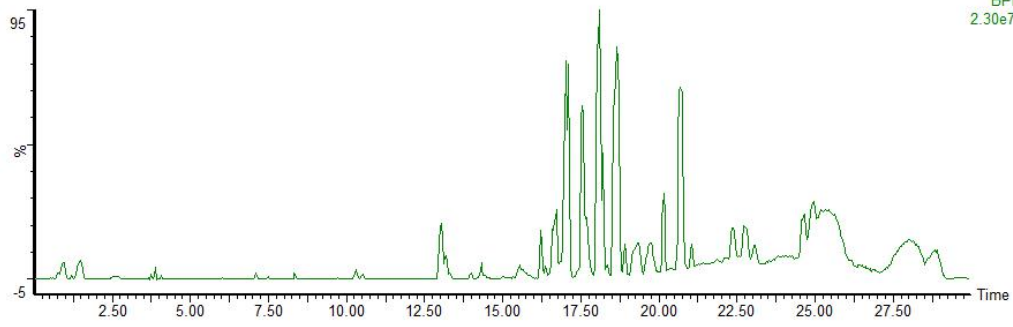

wcz\_blood\_model\_6\_pos

1: TOF MS ES+  
BPI  
2.16e7

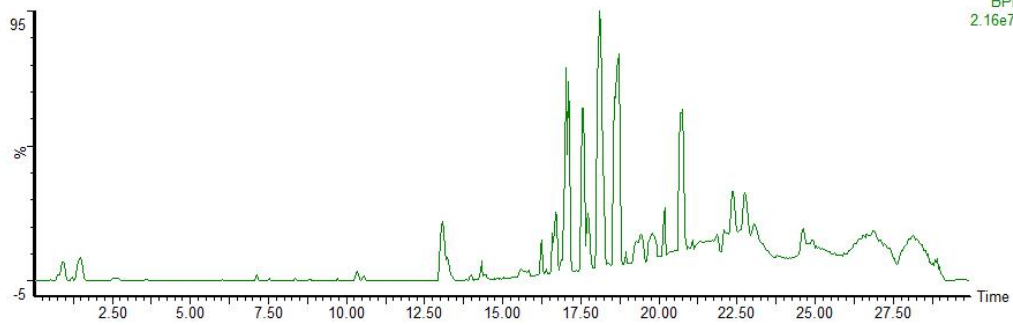

wcz\_blood\_model\_7\_pos

1: TOF MS ES+  
BPI  
2.17e7

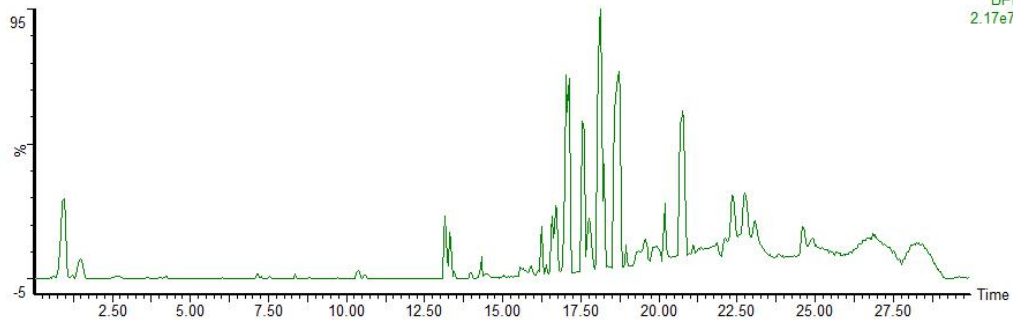

wcz\_blood\_model\_8\_pos

1: TOF MS ES+  
BPI  
2.11e7

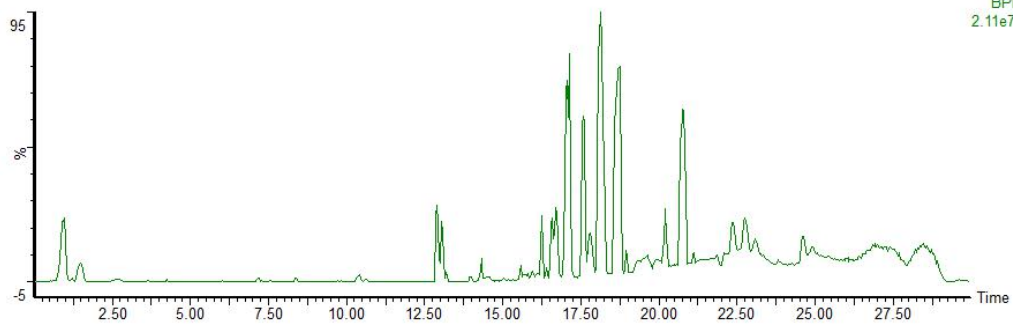

### 3. ESI+/ serum/ HPF group

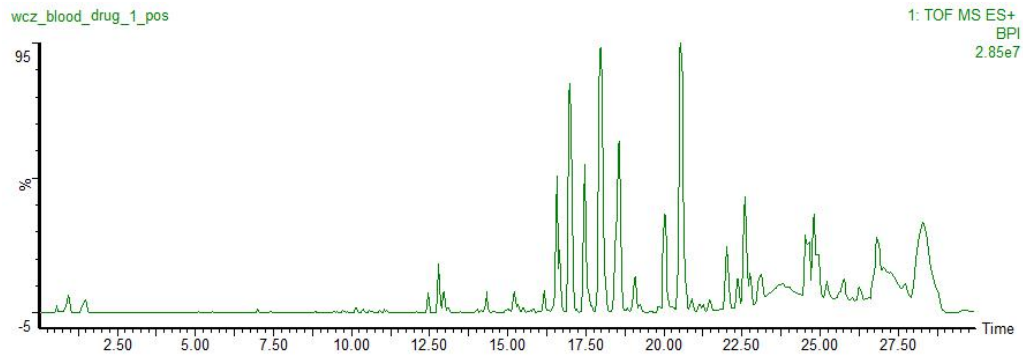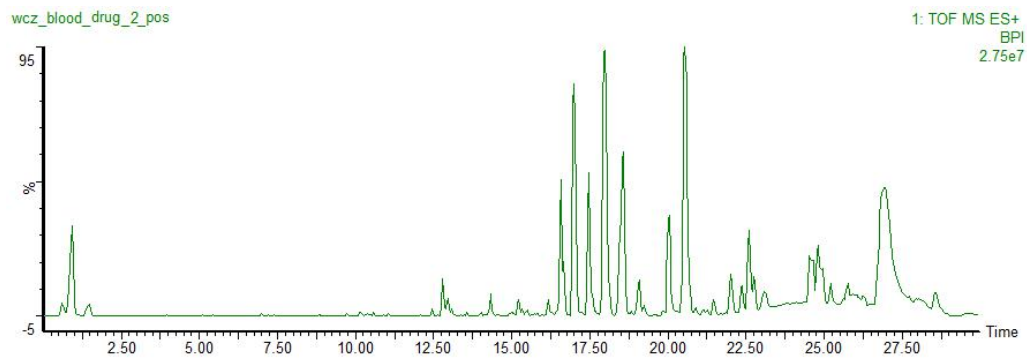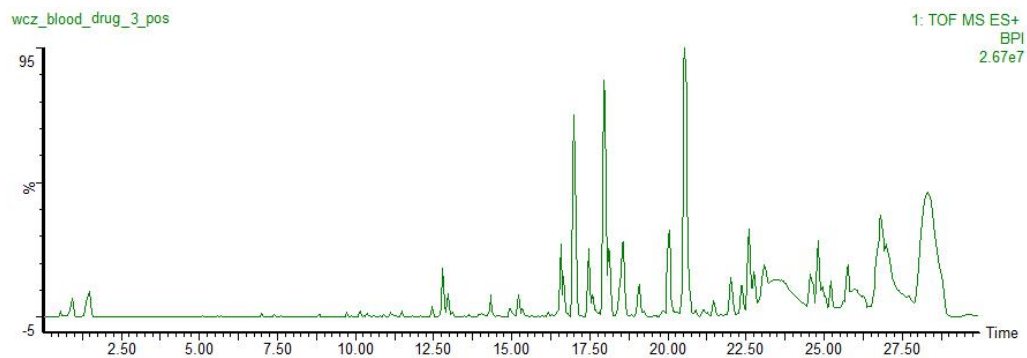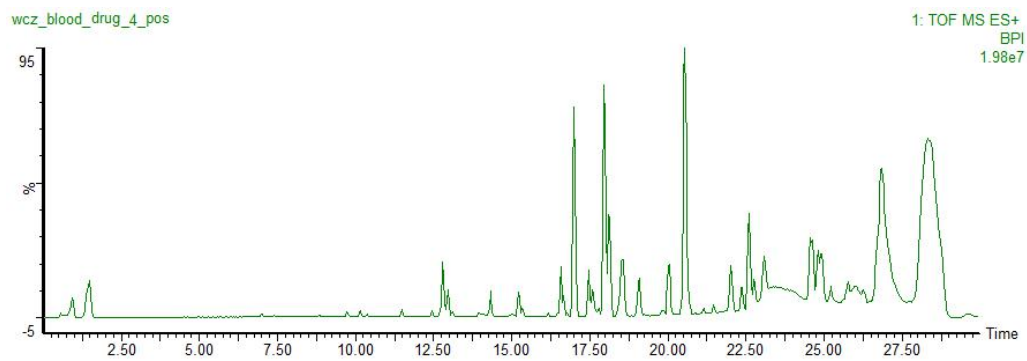



wcz\_blood\_drug\_5\_pos

1: TOF MS ES+  
BPI  
1.67e7

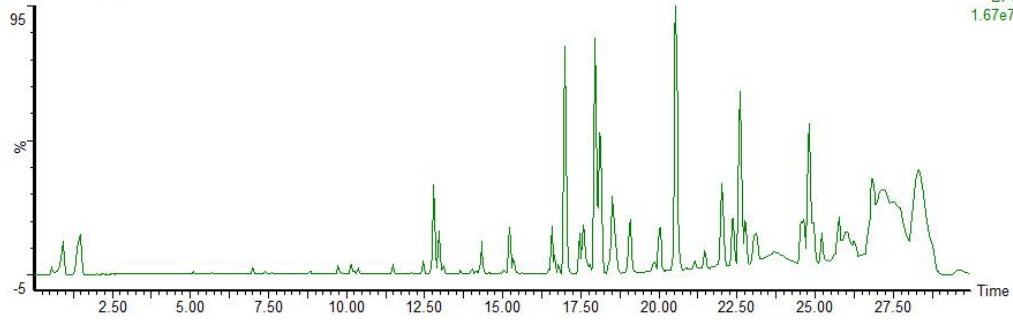

wcz\_blood\_drug\_6\_pos

1: TOF MS ES+  
BPI  
2.61e7

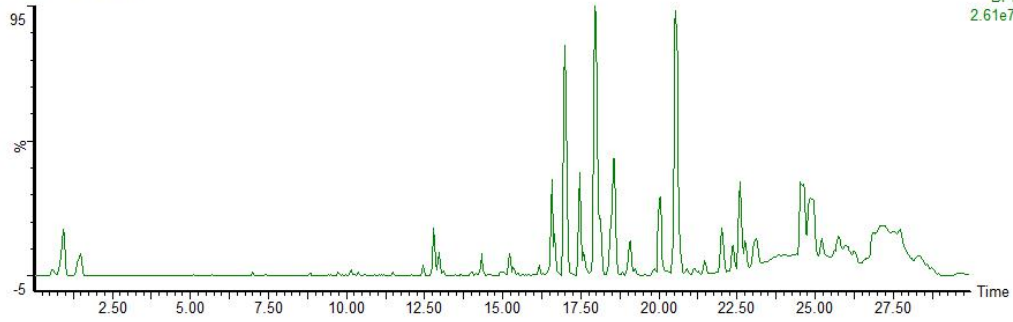

wcz\_blood\_drug\_7\_pos

1: TOF MS ES+  
BPI  
2.01e7

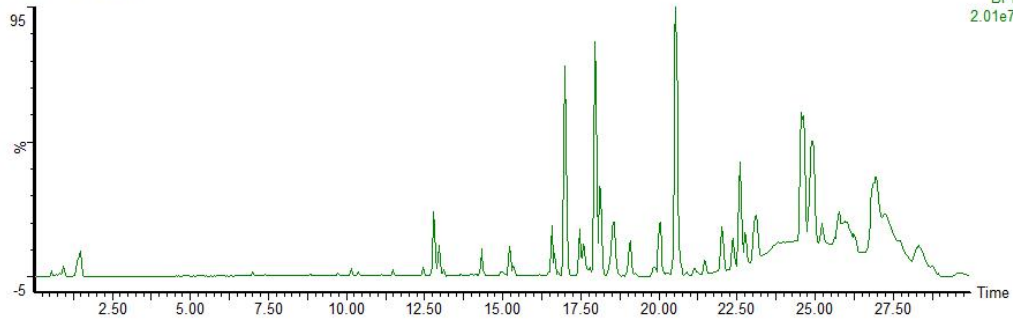

wcz\_blood\_drug\_8\_pos

1: TOF MS ES+  
BPI  
1.13e7

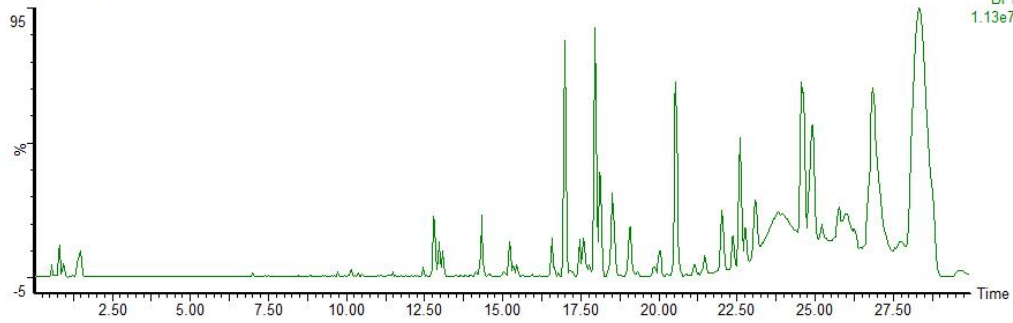

#### 4. ESI+/ hip/ normal control group

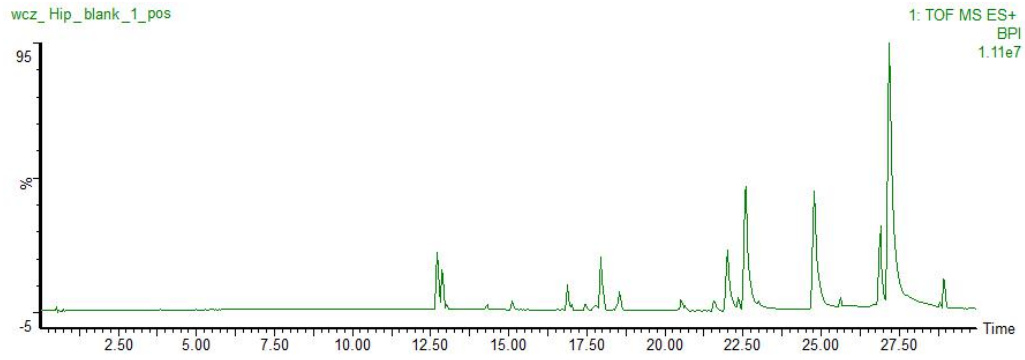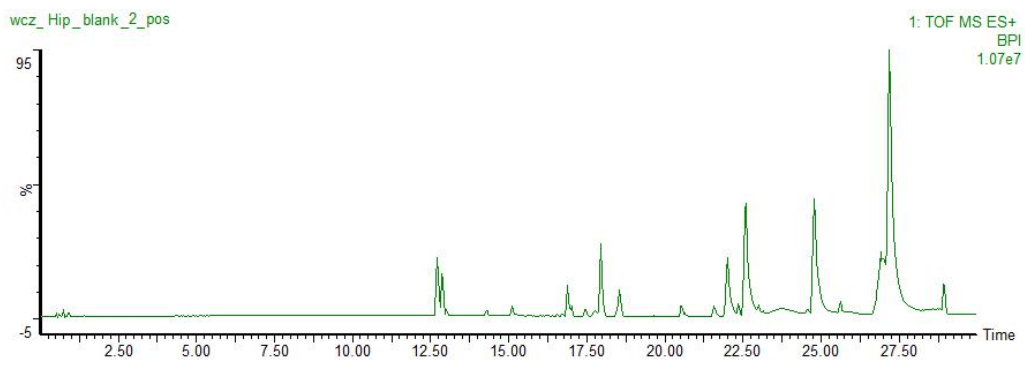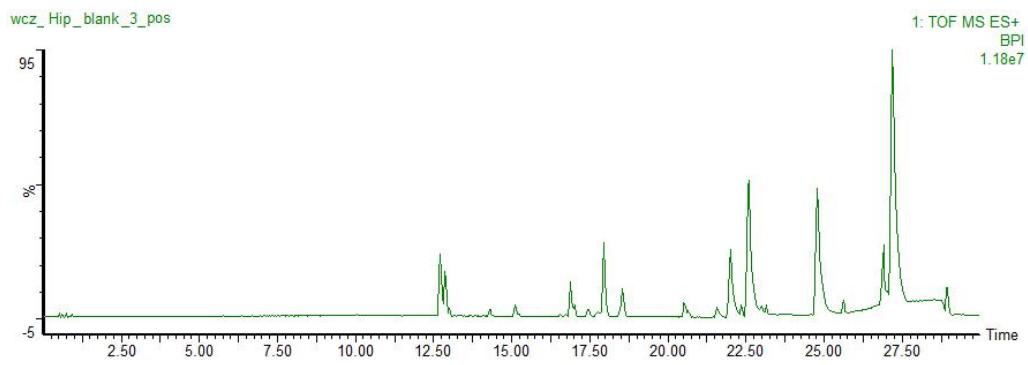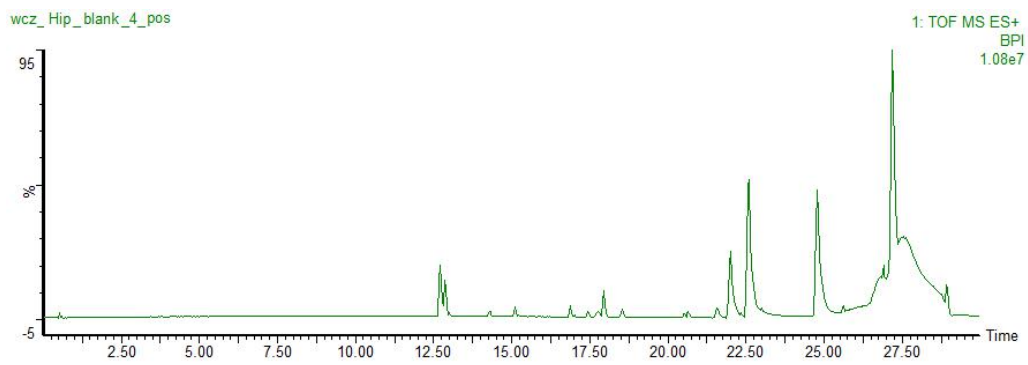

wcz\_Hip\_blank\_5\_pos

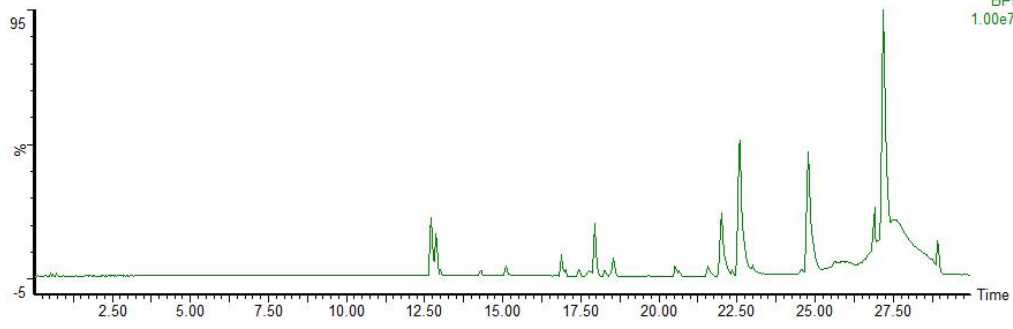

wcz\_Hip\_blank\_6\_pos

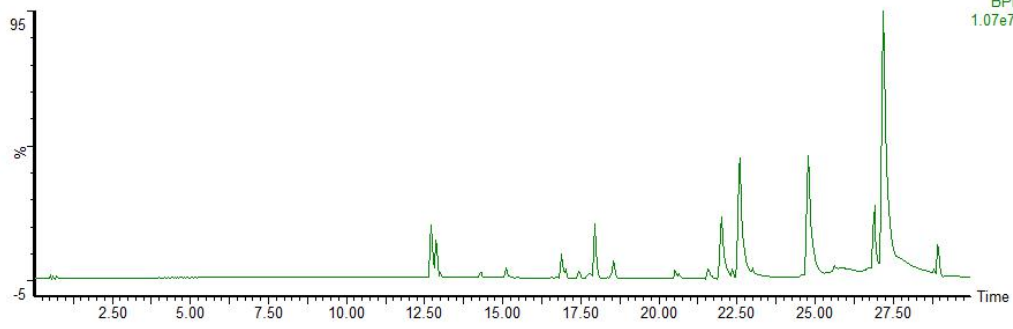

wcz\_Hip\_blank\_7\_pos

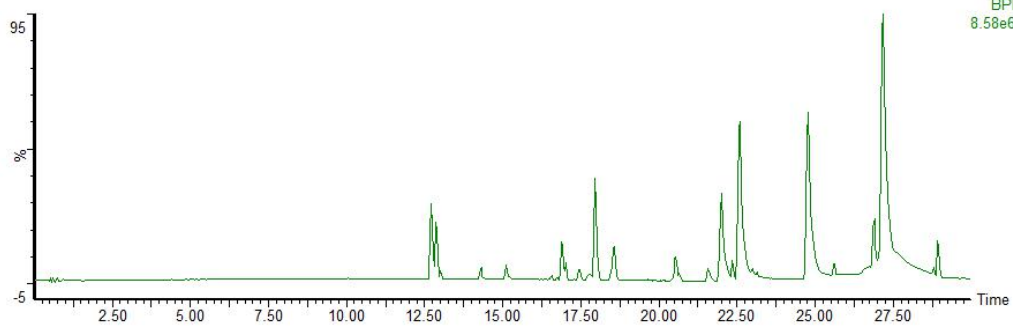

wcz\_Hip\_blank\_8\_pos

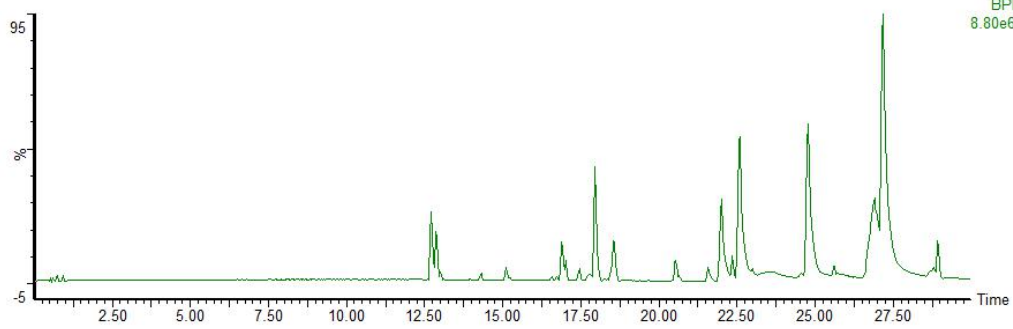

## 5. ESI+/ hip/ model group

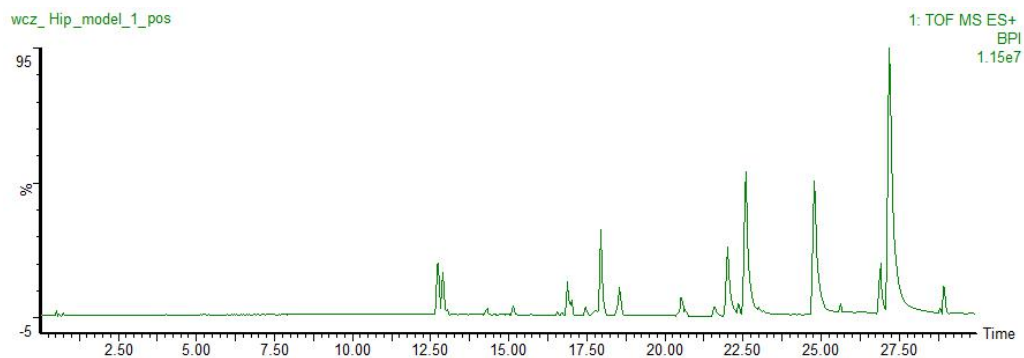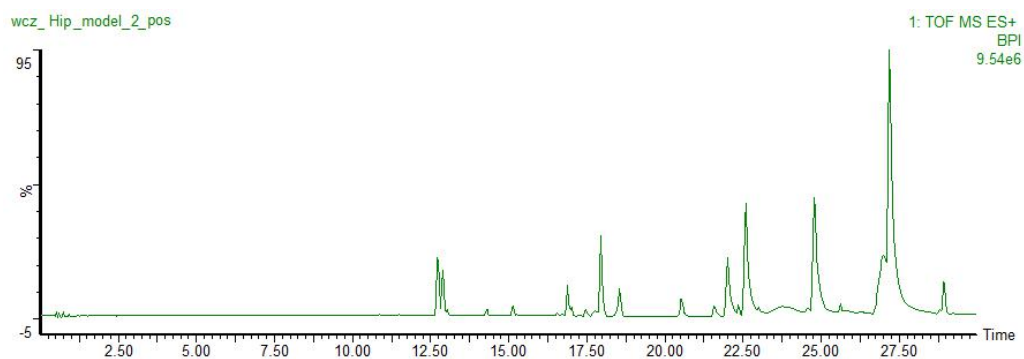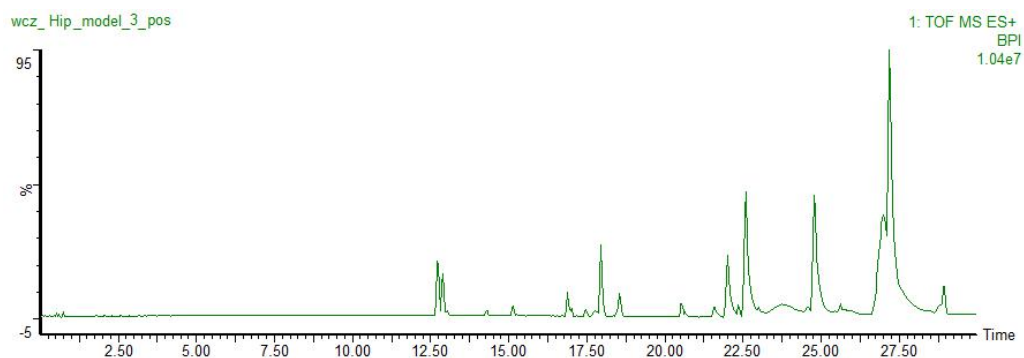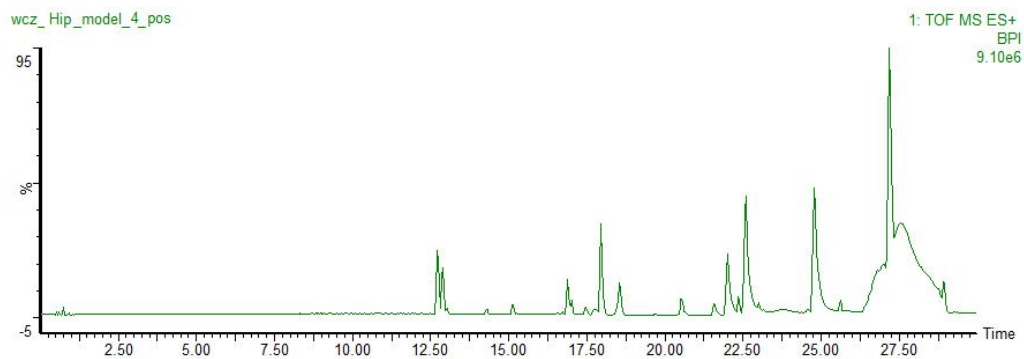

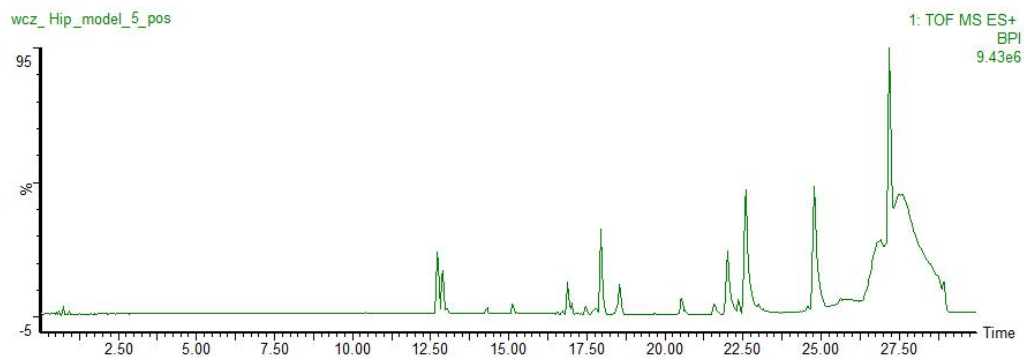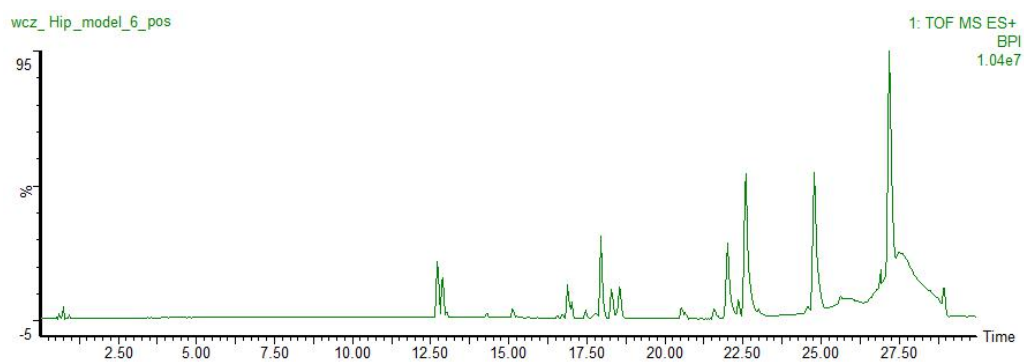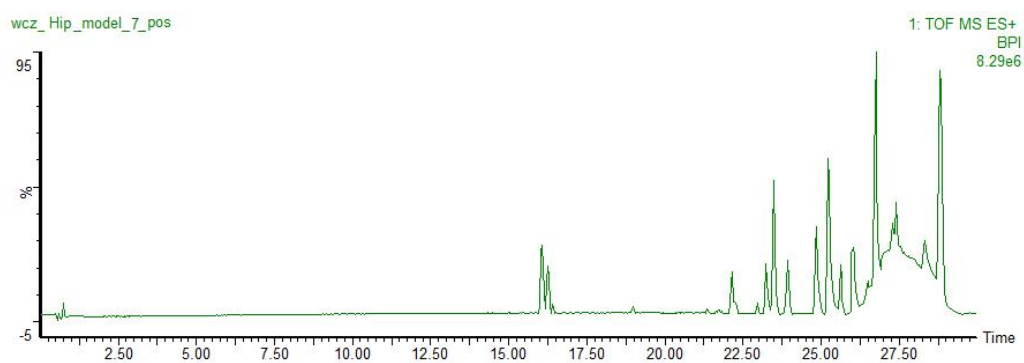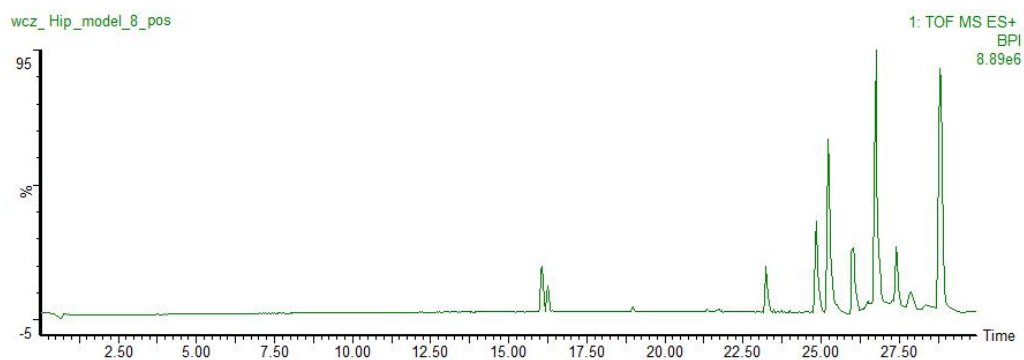

## 6. ESI+/ hip/ HPF group

wcz\_Hip\_drug\_pos\_1

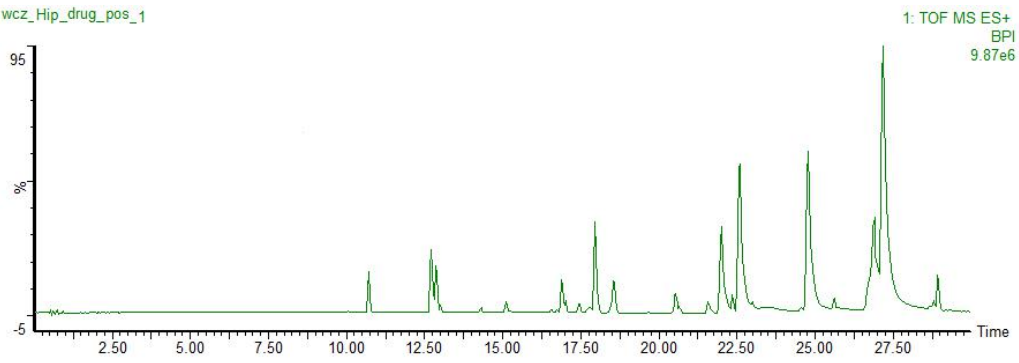

wcz\_Hip\_drug\_pos\_2

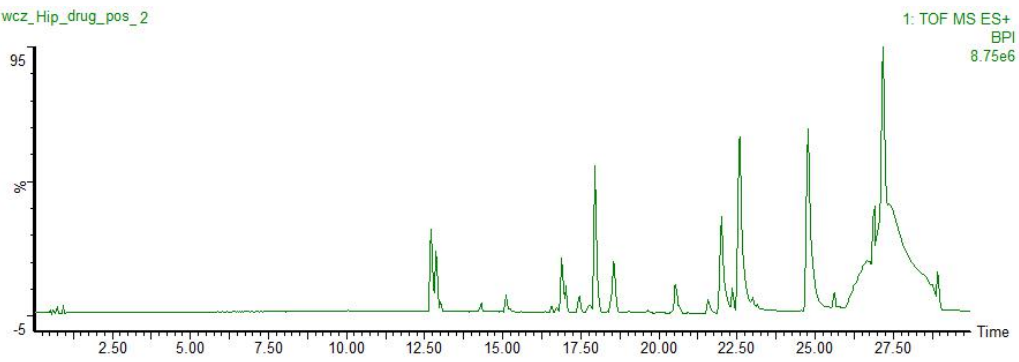

wcz\_Hip\_drug\_pos\_3

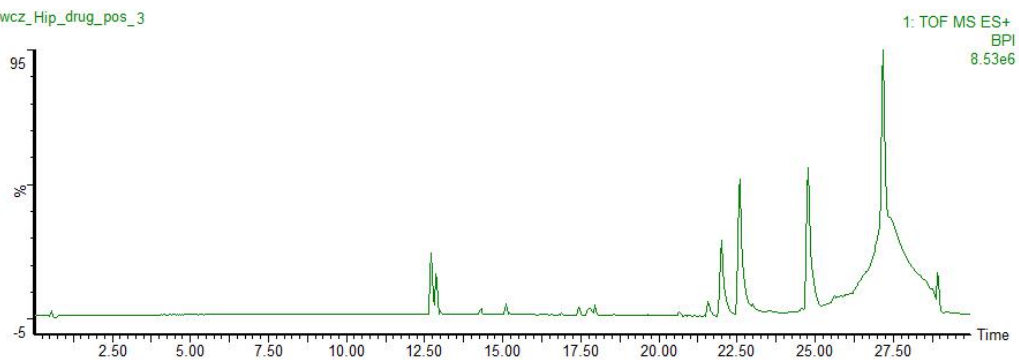

wcz\_Hip\_drug\_pos\_4

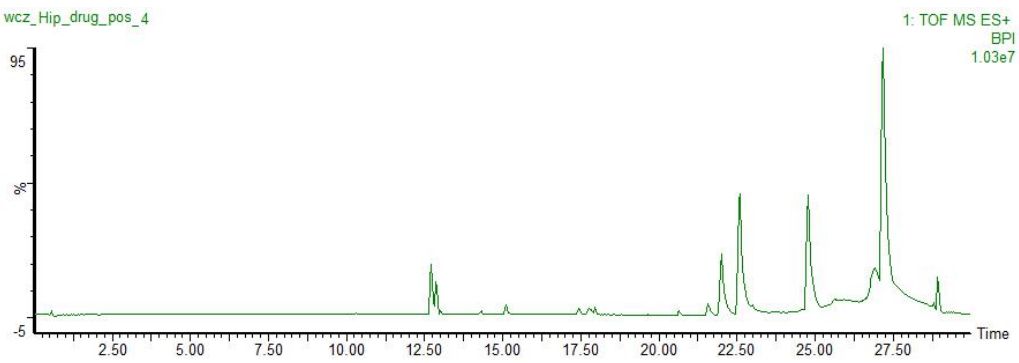

wcz\_Hip\_drug\_pos\_5

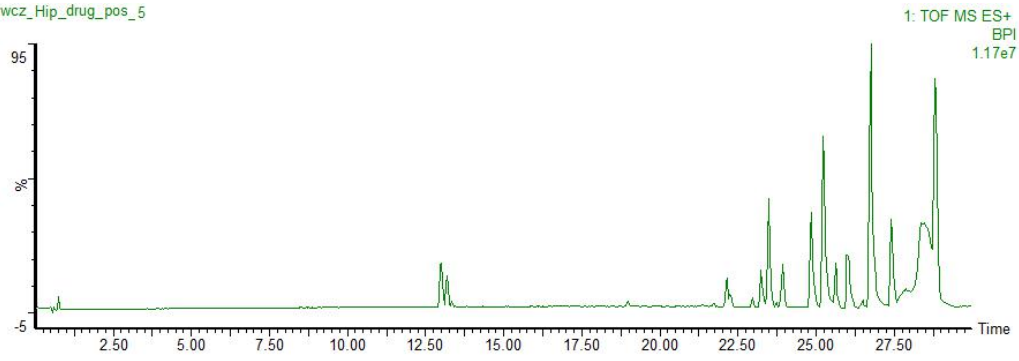

wcz\_Hip\_drug\_pos\_6

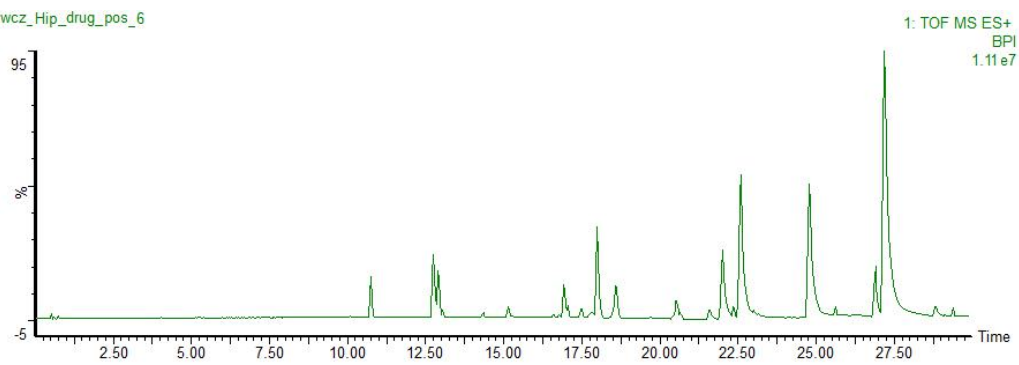

wcz\_Hip\_drug\_pos\_7

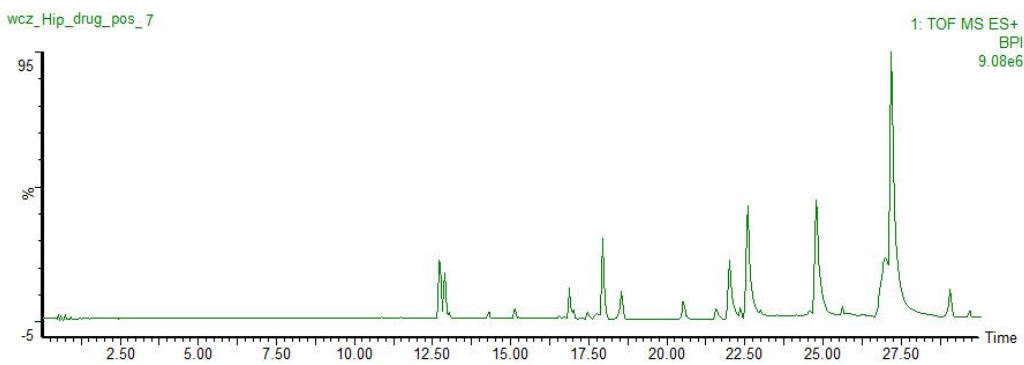

wcz\_Hip\_drug\_pos\_8

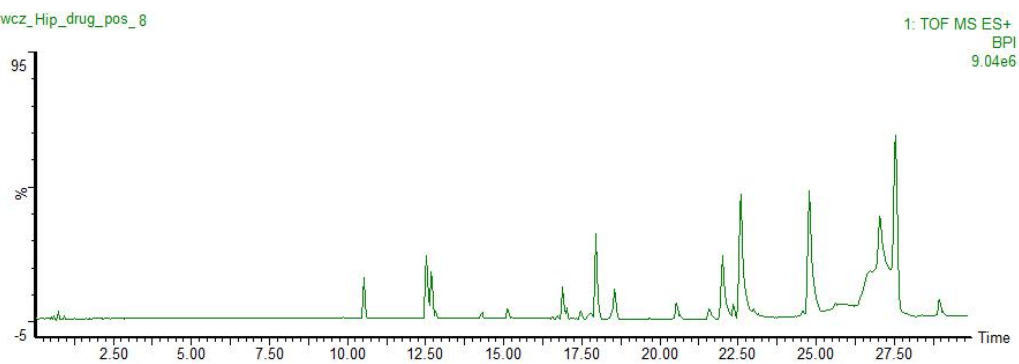

## 7. ESI-/ serum/ normal control group

wcz\_blank\_blood\_neg\_1

1: TOF MS ES-  
BPI  
2.09e7

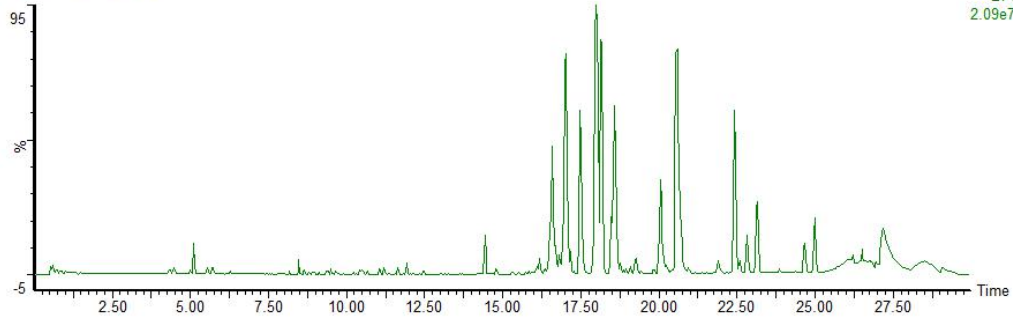

wcz\_blank\_blood\_neg\_2

1: TOF MS ES-  
BPI  
2.57e7

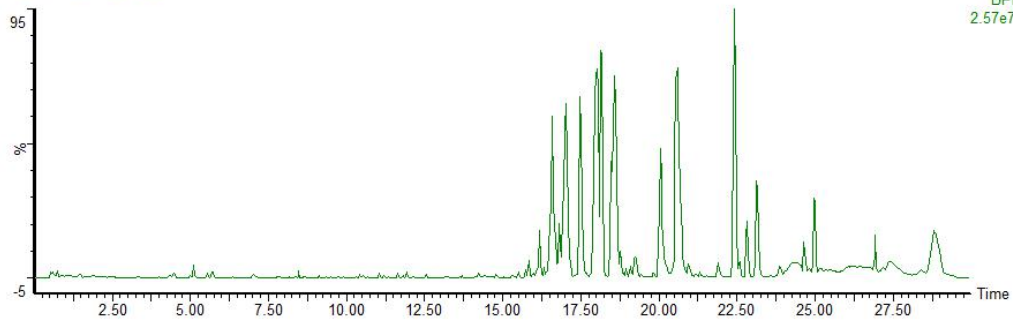

wcz\_blank\_blood\_neg\_3

1: TOF MS ES-  
BPI  
2.15e7

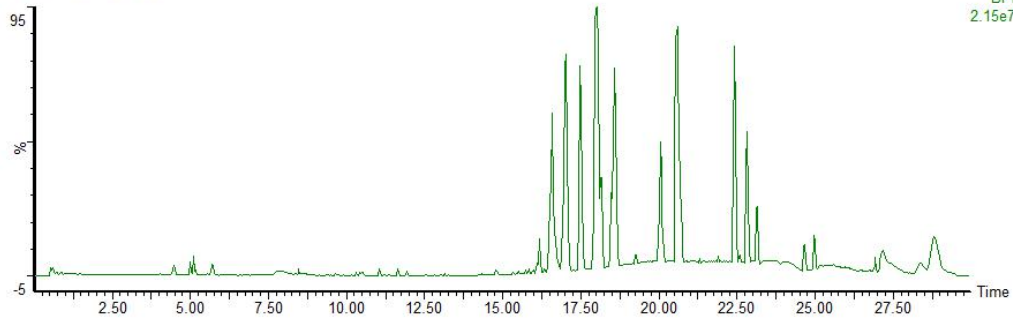

wcz\_blank\_blood\_neg\_4

1: TOF MS ES-  
BPI  
2.10e7

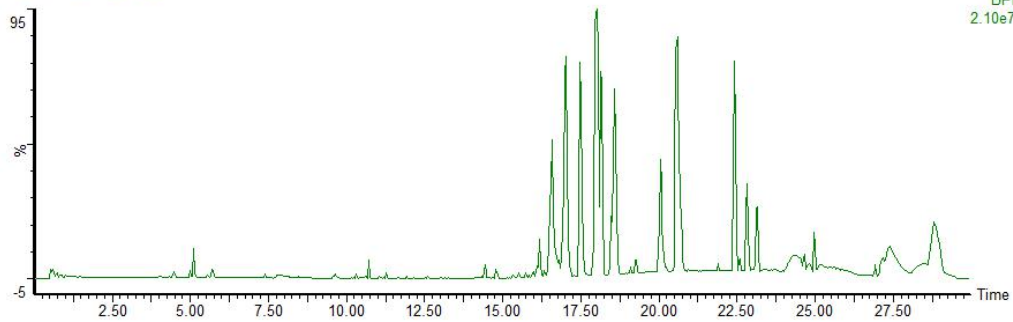



wcz\_blank\_blood\_neg\_5

1: TOF MS ES-  
BPI  
2.06e7

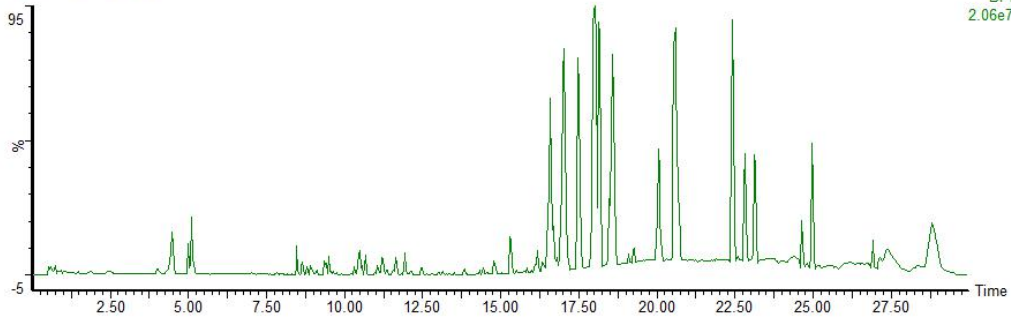

wcz\_blank\_blood\_neg\_6

1: TOF MS ES-  
BPI  
2.09e7

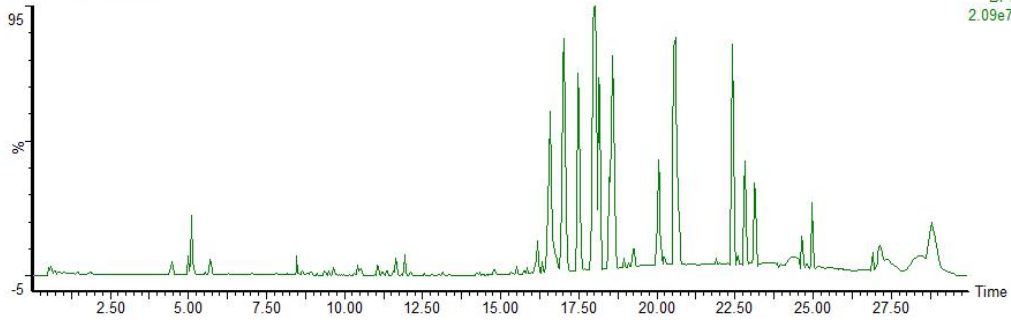

wcz\_blank\_blood\_neg\_7

1: TOF MS ES-  
BPI  
1.99e7

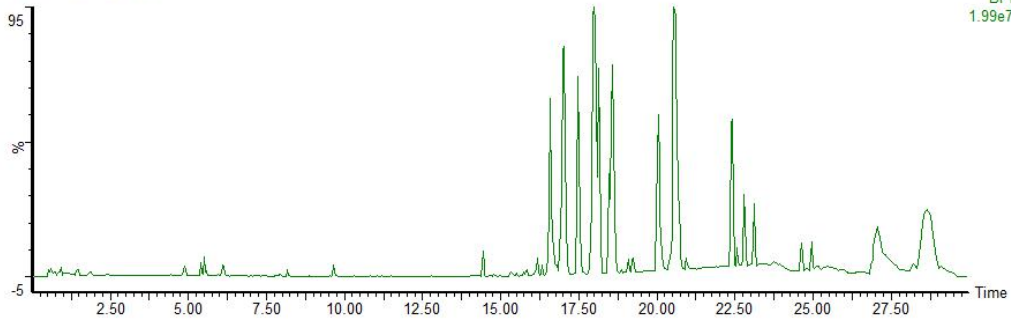

wcz\_blank\_blood\_neg\_8

1: TOF MS ES-  
BPI  
2.16e7

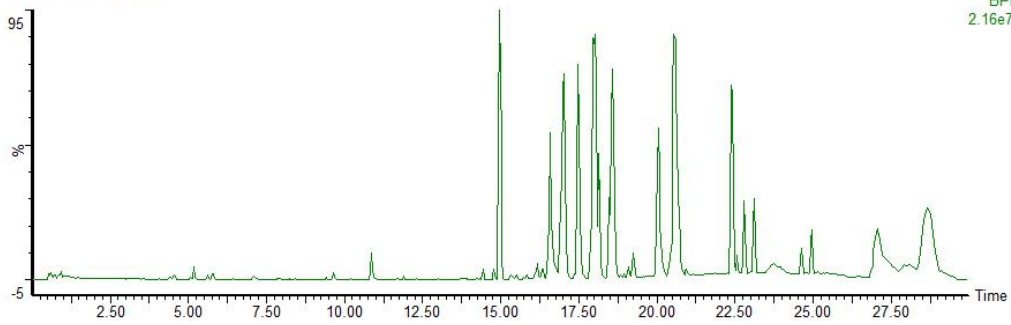

## 8. ESI-/ serum/ model group

wcz\_blood\_model\_1\_neg

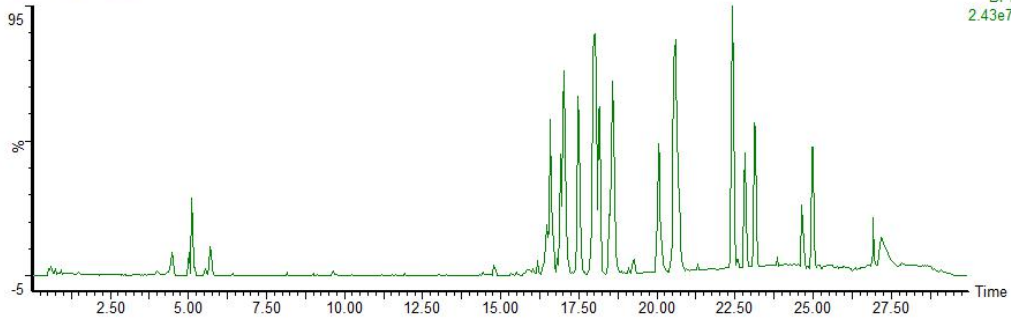

wcz\_blood\_model\_2\_neg

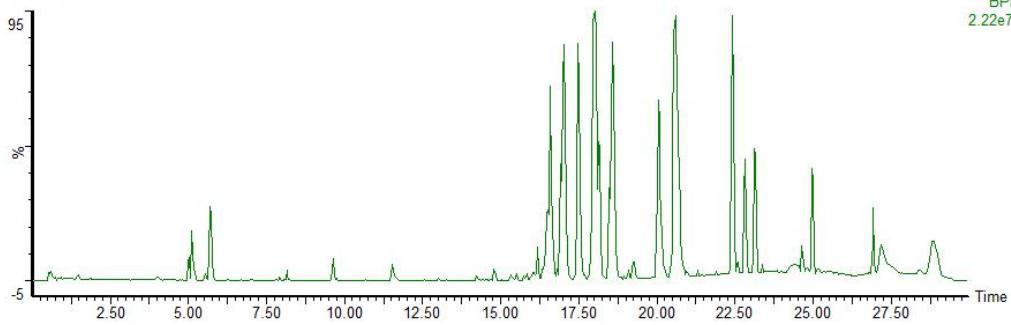

wcz\_blood\_model\_3\_neg

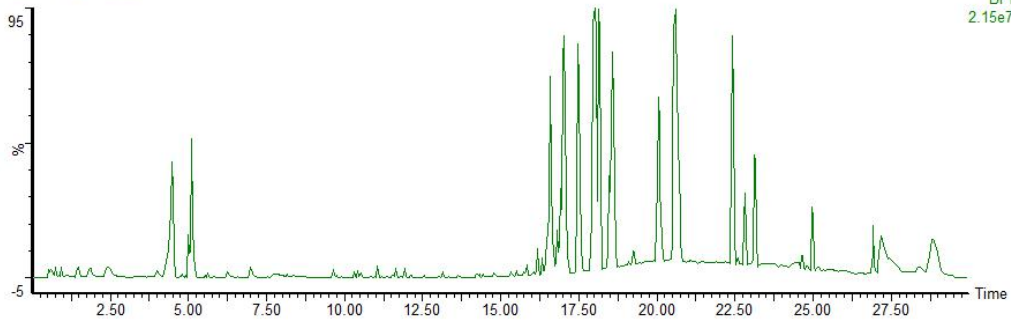

wcz\_blood\_model\_4\_neg

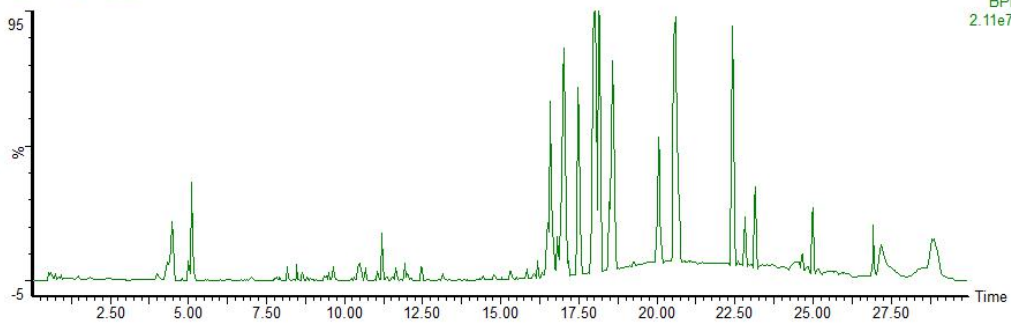

wcz\_blood\_model\_5\_neg

1: TOF MS ES-  
BPI  
2.18e7

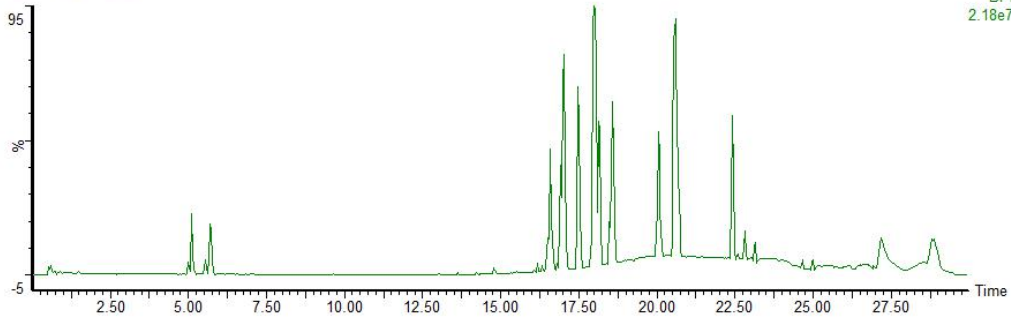

wcz\_blood\_model\_6\_neg

1: TOF MS ES-  
BPI  
2.05e7

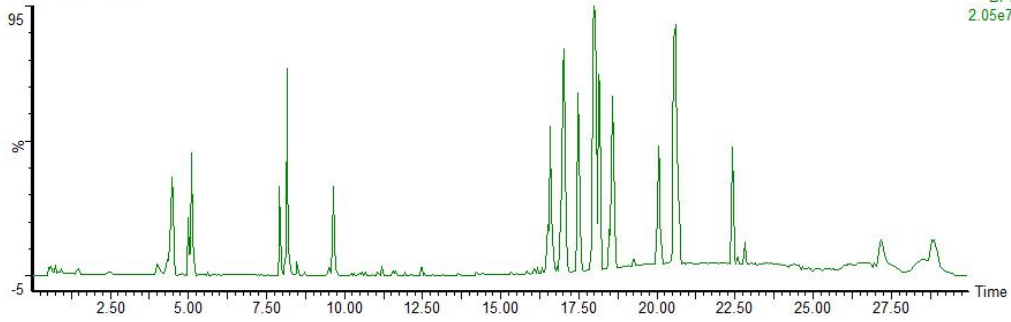

wcz\_blood\_model\_7\_neg

1: TOF MS ES-  
BPI  
2.12e7

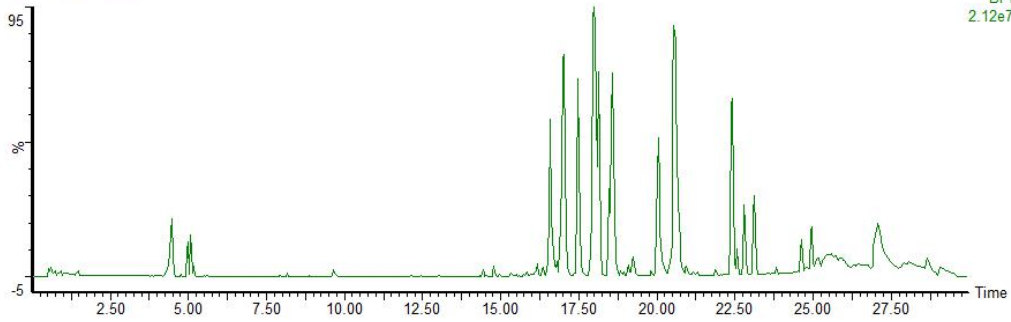

wcz\_blood\_model\_8\_neg

1: TOF MS ES-  
BPI  
2.05e7

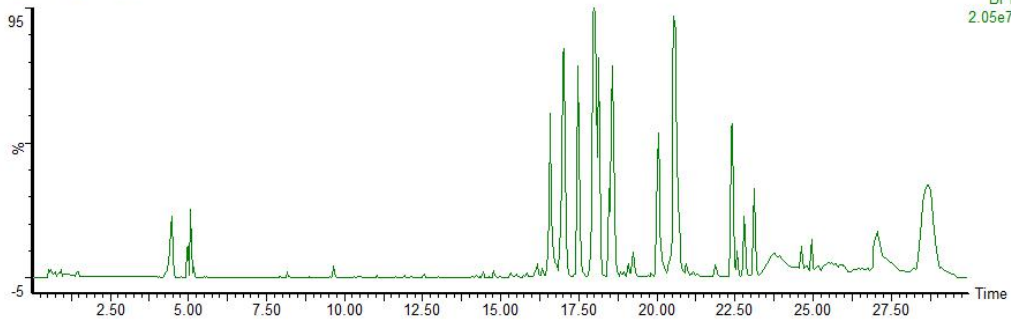

## 9. ESI-/ serum/ HPF group

wcz\_blood\_drug\_neg\_1

1: TOF MS ES-  
BPI  
2.34e7

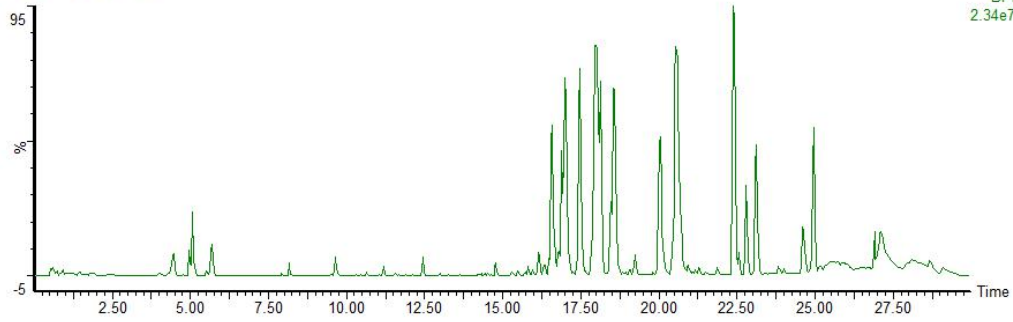

wcz\_blood\_drug\_neg\_2

1: TOF MS ES-  
BPI  
2.09e7

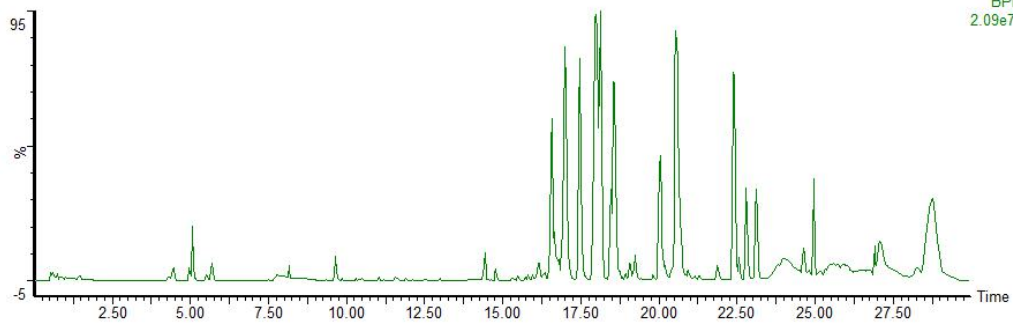

wcz\_blood\_drug\_neg\_3

1: TOF MS ES-  
BPI  
2.02e7

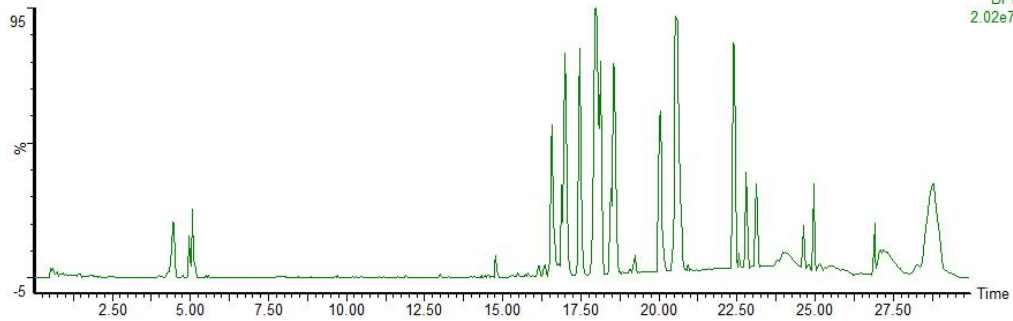

wcz\_blood\_drug\_neg\_4

1: TOF MS ES-  
BPI  
2.00e7

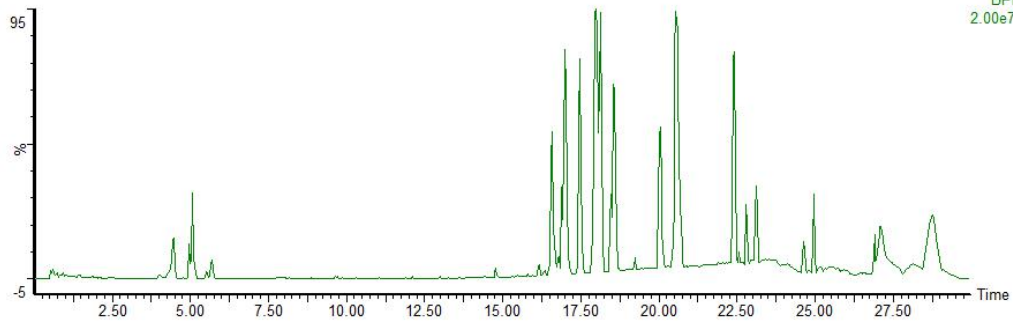

wcz\_blood\_drug\_neg\_5

1: TOF MS ES-  
BPI  
2.04e7

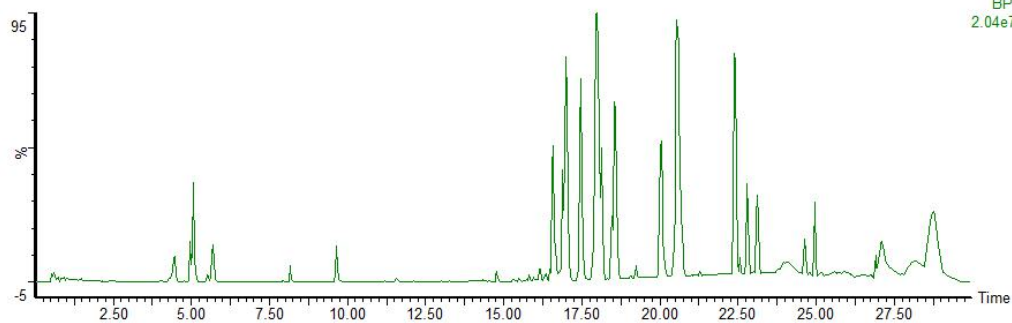

wcz\_blood\_drug\_neg\_6

1: TOF MS ES-  
BPI  
2.35e7

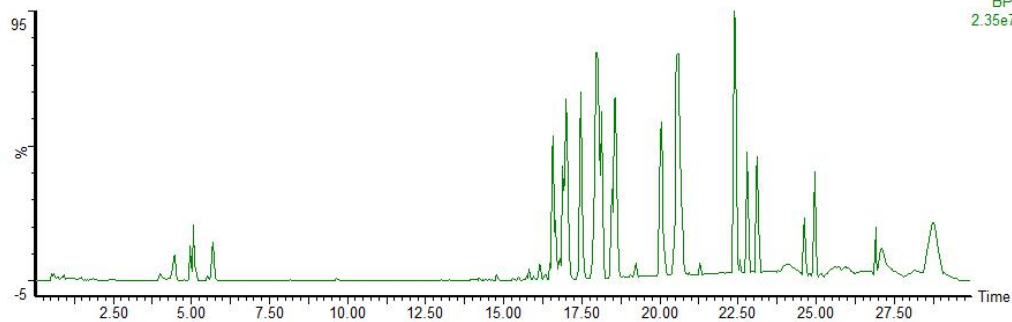

wcz\_blood\_drug\_neg\_7

1: TOF MS ES-  
BPI  
1.98e7

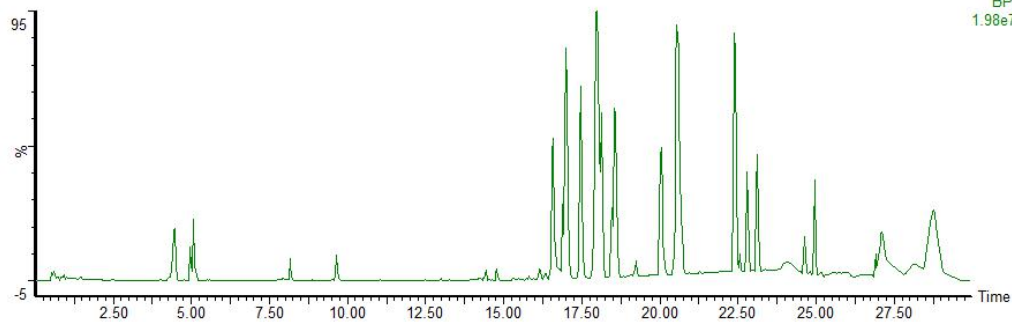

wcz\_blood\_drug\_neg\_8

1: TOF MS ES-  
BPI  
2.04e7

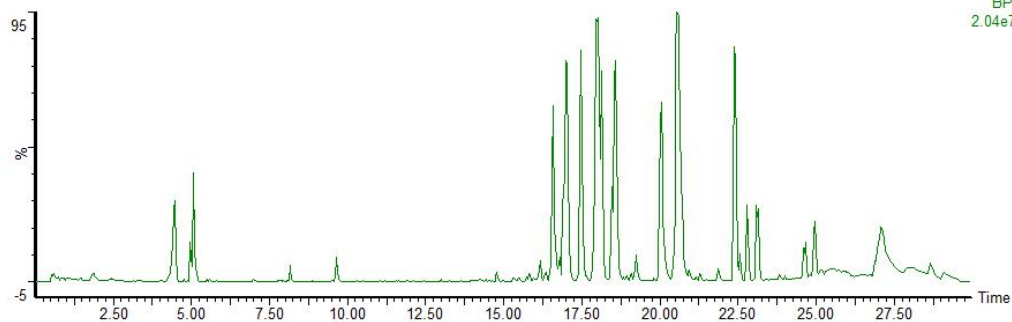

## 10. ESI-/ hip/ normal control group

wcz\_Hip\_blank\_1\_neg

1: TOF MS ES-  
BPI  
8.12e6

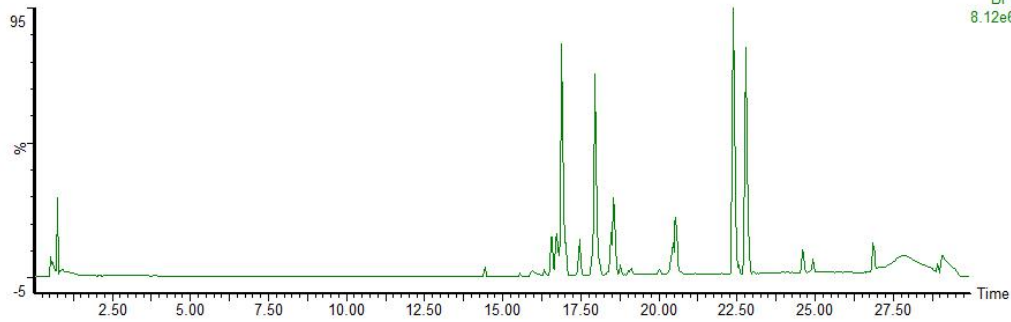

wcz\_Hip\_blank\_2\_neg

1: TOF MS ES-  
BPI  
8.45e6

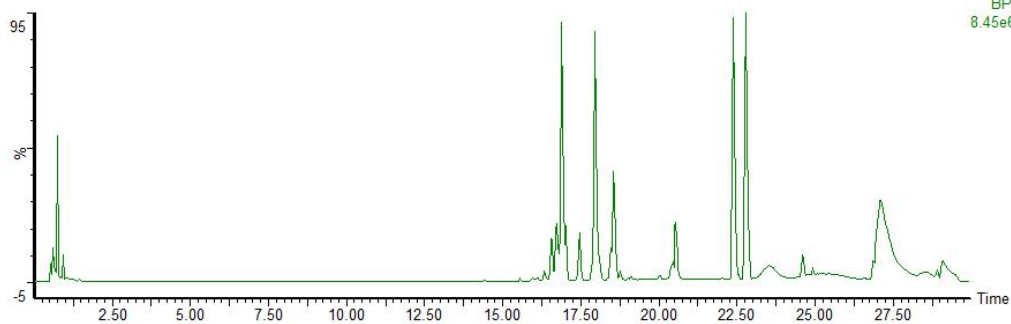

wcz\_Hip\_blank\_3\_neg

1: TOF MS ES-  
BPI  
9.10e6

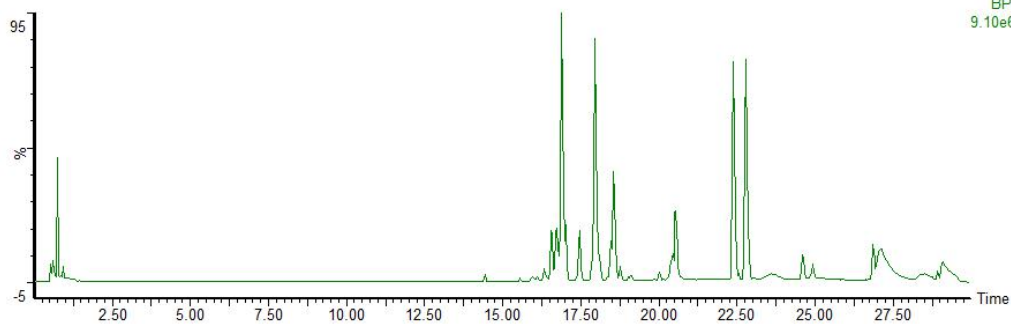

wcz\_Hip\_blank\_4\_neg

1: TOF MS ES-  
BPI  
6.08e6

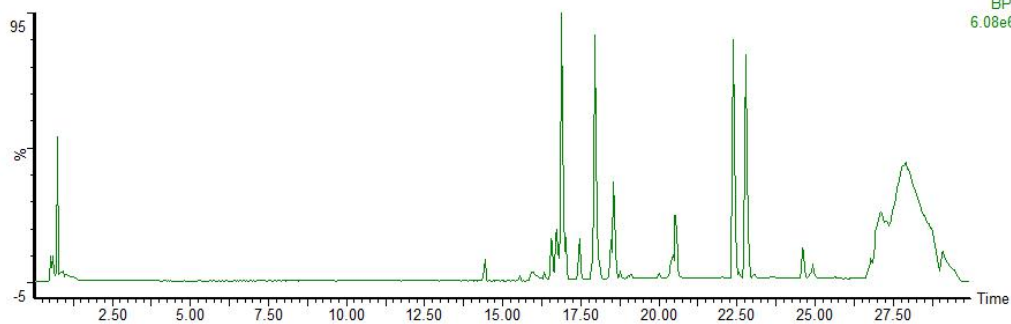

wcz\_Hip\_blank\_5\_neg

1: TOF MS ES-  
BPI  
7.37e6

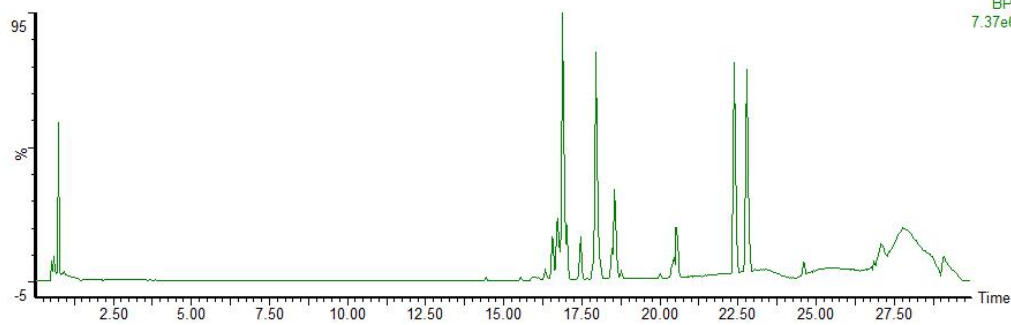

wcz\_Hip\_blank\_6\_neg

1: TOF MS ES-  
BPI  
5.98e6

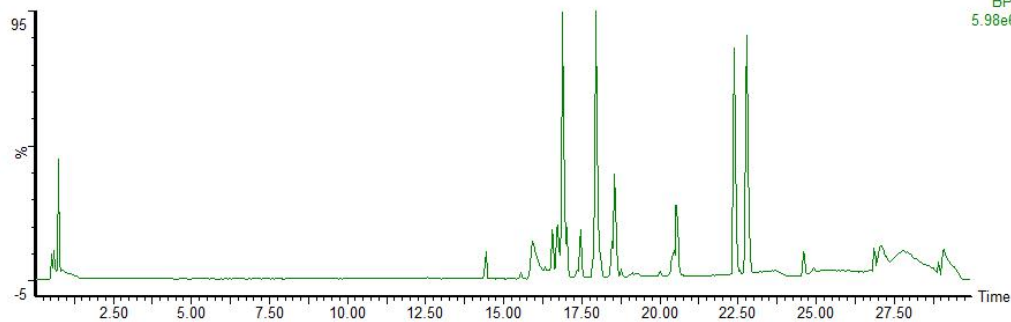

wcz\_Hip\_blank\_7\_neg

1: TOF MS ES-  
BPI  
9.69e6

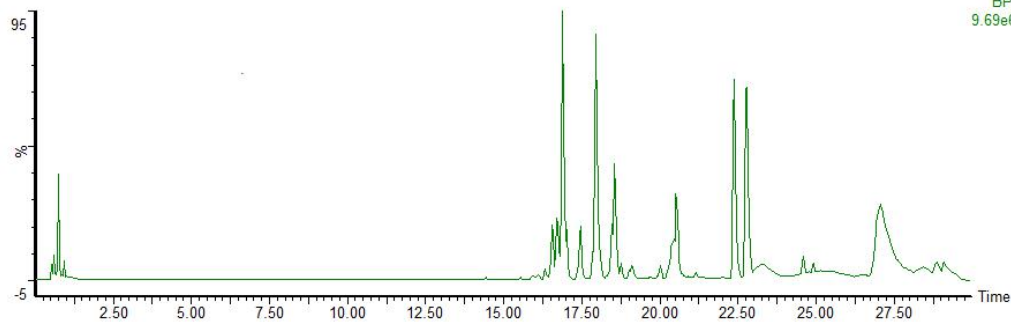

wcz\_Hip\_blank\_8\_neg

1: TOF MS ES-  
BPI  
7.73e6

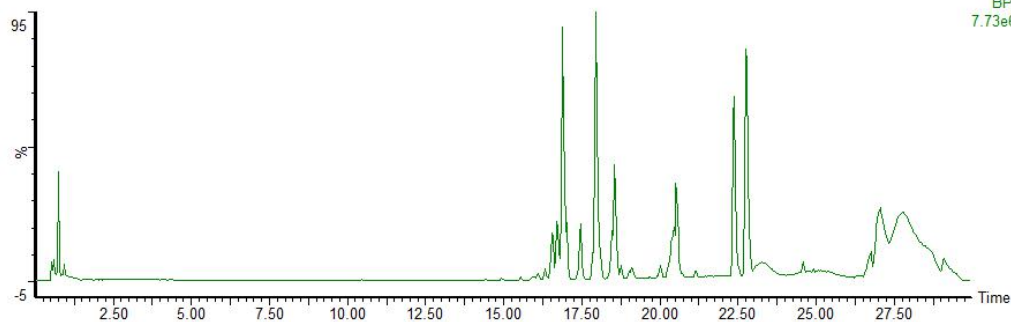

## 11. ESI-/ hip/ model group

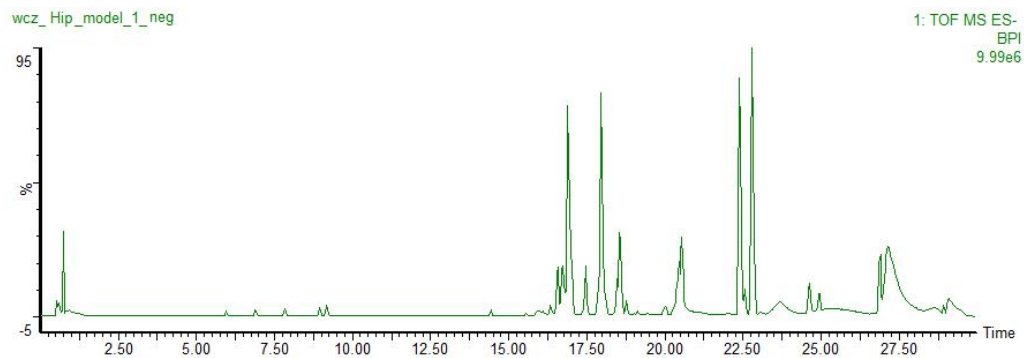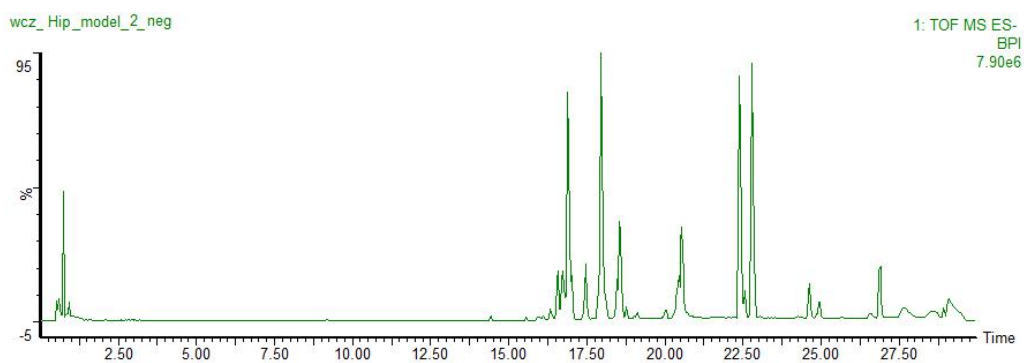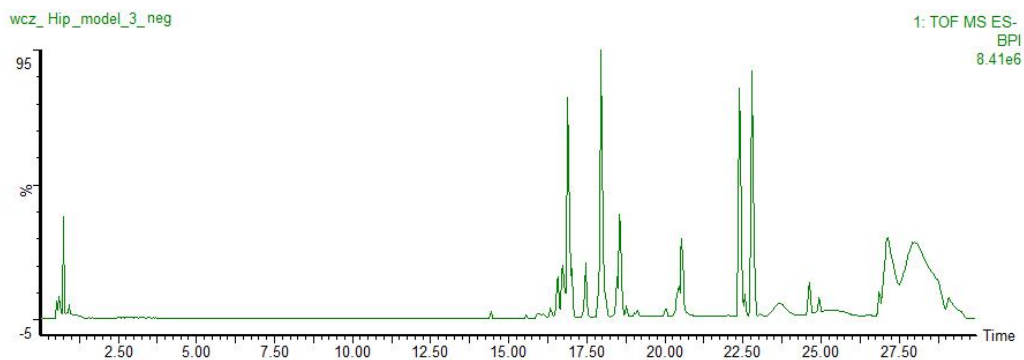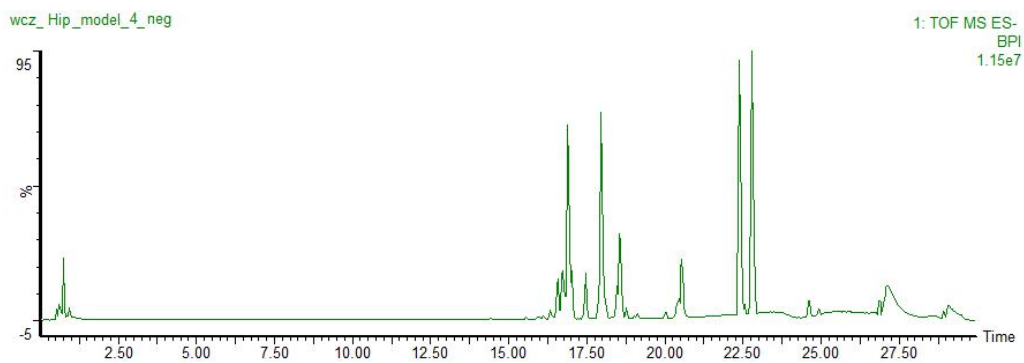



wcz\_Hip\_model\_5\_neg

1: TOF MS ES-  
BPI  
9.27e6

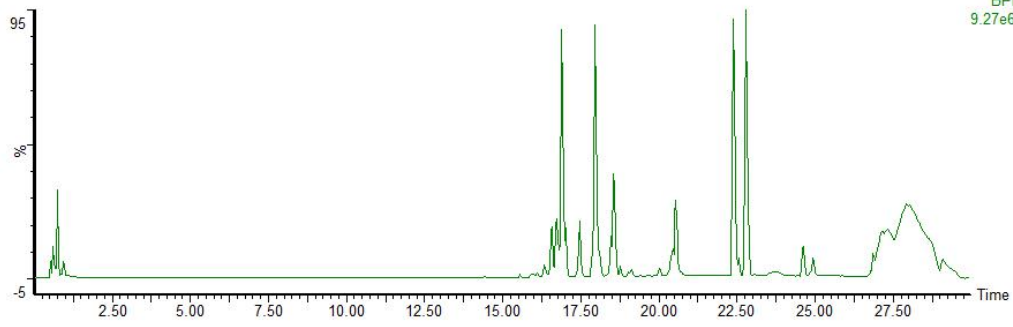

wcz\_Hip\_model\_6\_neg

1: TOF MS ES-  
BPI  
8.97e6

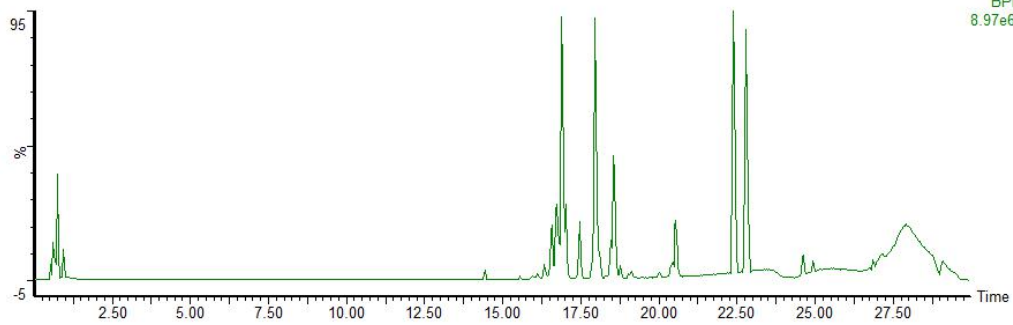

wcz\_Hip\_model\_7\_neg

1: TOF MS ES-  
BPI  
7.52e6

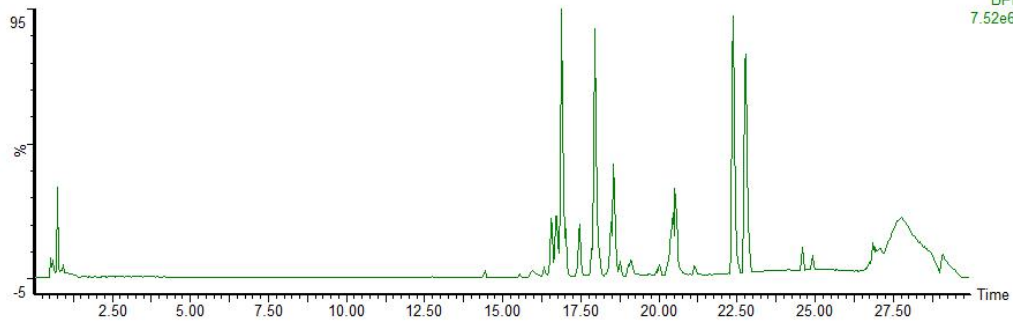

wcz\_Hip\_model\_8\_neg

1: TOF MS ES-  
BPI  
7.05e6

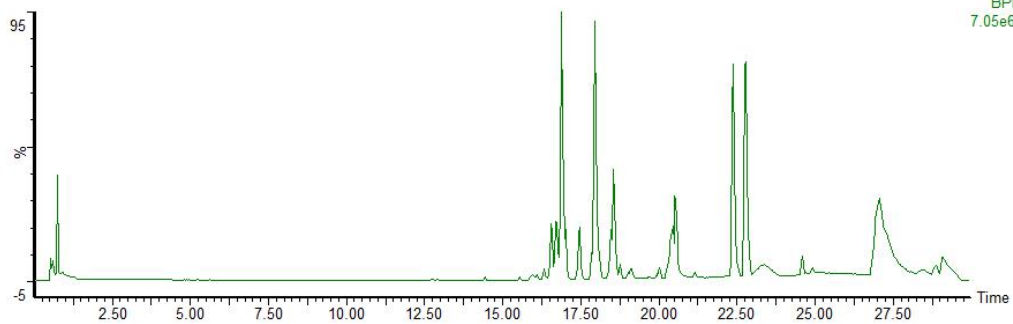

## 12. ESI-/ hip/ HPF group

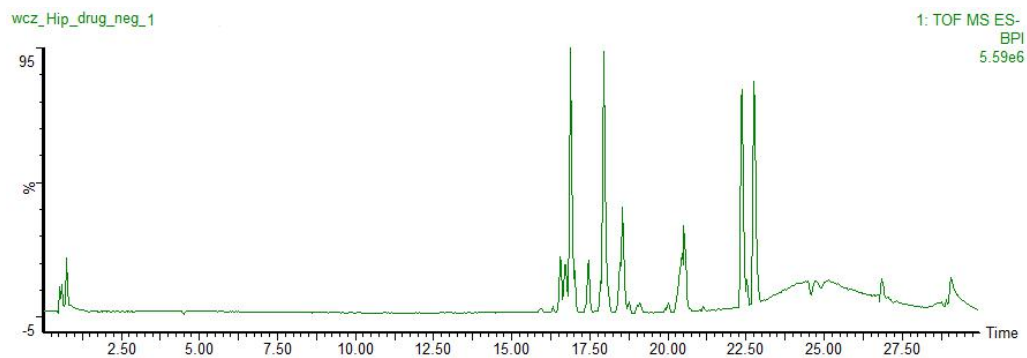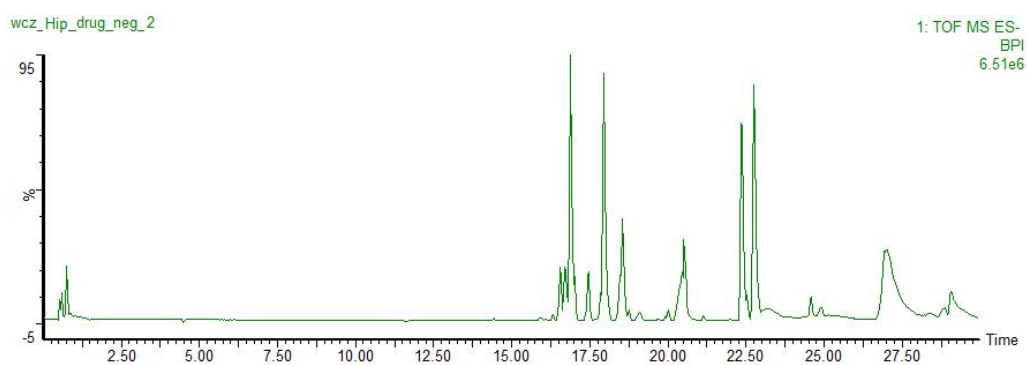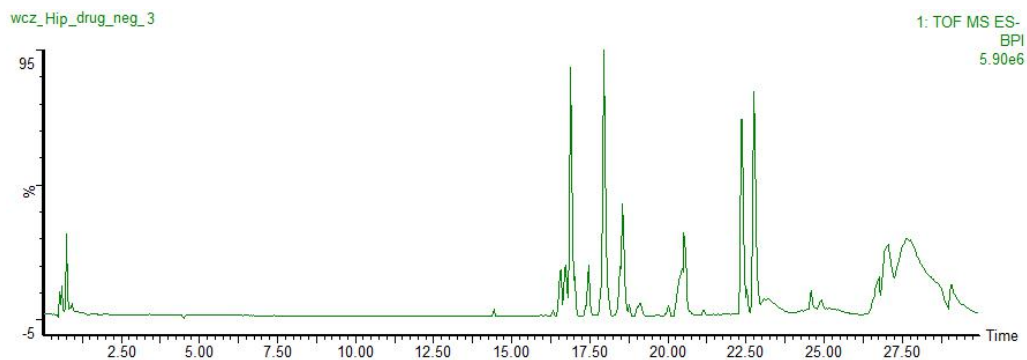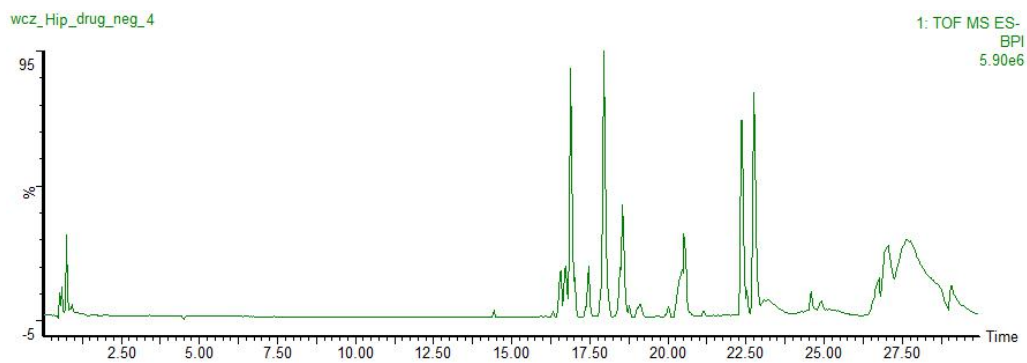

wcz\_Hip\_drug\_neg\_5

1: TOF MS ES-  
BPI  
5.38e6

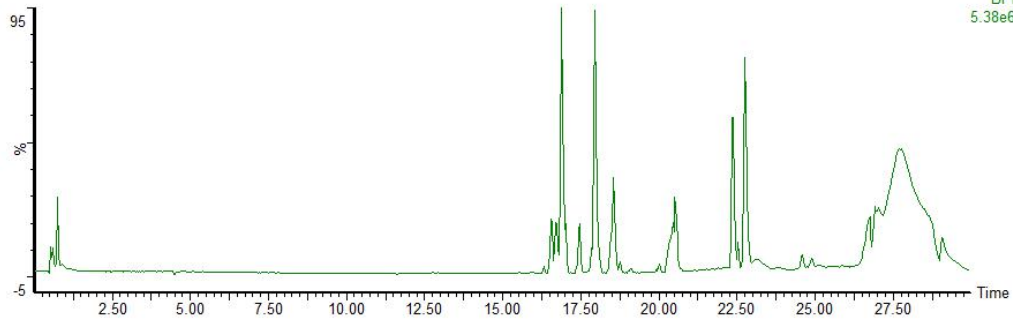

wcz\_Hip\_drug\_neg\_6

1: TOF MS ES-  
BPI  
4.38e6

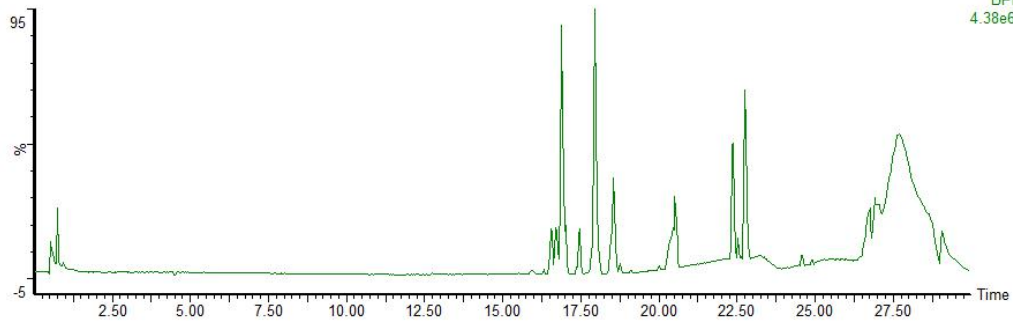

wcz\_Hip\_drug\_neg\_7

1: TOF MS ES-  
BPI  
5.89e6

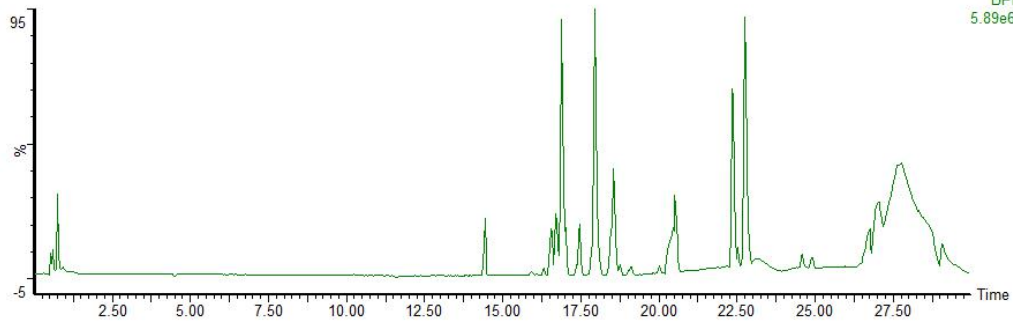

wcz\_Hip\_drug\_neg\_8

1: TOF MS ES-  
BPI  
9.30e6

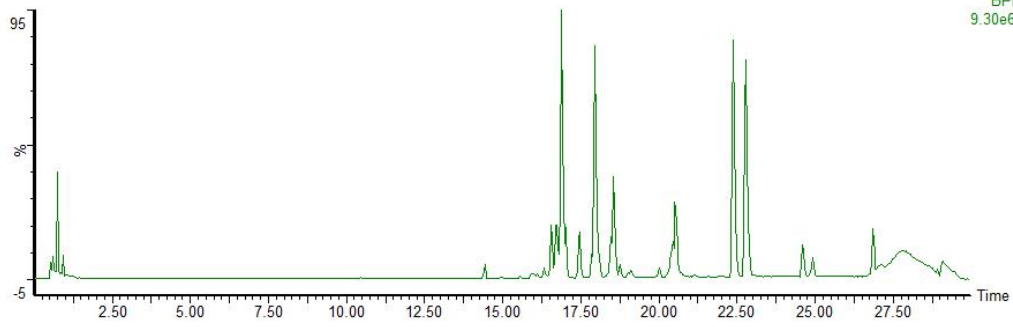

## Supplementary Materials II

### *MS Spectra of Each Potential Biomarker in Function 1 (Low Energy) and Function 2 (High Energy)*

1. MS Spectra of *Glycerophosphocholine* in Function 1 and Function 2.
2. MS Spectra of *Myoinositol* in Function 1 and Function 2.
3. MS Spectra of  $\alpha$ -*Ketoglutarate* in Function 1 and Function 2.
4. MS Spectra of *Glutathione* in Function 1 and Function 2. MS Spectra of *Citric Acid* in Function 1 and Function 2.
5. MS Spectra of *Oxidized Glutathione* in Function 1 and Function 2.
6. MS Spectra of *Pantetheine 4'-phosphate* in Function 1 and Function 2.
7. MS Spectra of *Pantothenic acid* in Function 1 and Function 2.
8. MS Spectra of *L-Tryptophan* in Function 1 and Function 2.
9. MS Spectra of *Indoleacetaldehyde* in Function 1 and Function 2.
10. MS Spectra of *Phytosphingosin* in Function 1 and Function 2.
11. MS Spectra of *Sphinganine* in Function 1 and Function 2.
12. MS Spectra of *Sphingosine 1-phosphate* in Function 1 and Function 2.
13. MS Spectra of *Sphinganine 1-phosphate* in Function 1 and Function 2.
14. MS Spectra of *Leukotriene A4* in Function 1 and Function 2.
15. MS Spectra of *12,13-EpOME* in Function 1 and Function 2.
16. MS Spectra of *19 (S)-HETE* in Function 1 and Function 2.
17. MS Spectra of *LysoPC (18:1(9Z))* in Function 1 and Function 2.

18. MS Spectra of 18:1/18:3 *phosphatidylcholine* in Function 1 and Function 2.
19. MS Spectra of *Arachidonic acid* in Function 1 and Function 2.
20. MS Spectra of *Linoleic acid* in Function 1 and Function 2.
21. MS Spectra of *20-Hydroxy-leukotriene B4* in Function 1 and Function 2.
22. MS Spectra of 18:1/18:2 *phosphatidylcholine* in Function 1 and Function 2.
23. MS Spectra of 32 *Pantetheine 4'-phosphate* in Function 1 and Function 2.
24. MS Spectra of *Lactosylceramide* in Function 1 and Function 2.
25. MS Spectra of 18:2/18:3 *phosphatidylcholine* in Function 1 and Function 2.
26. MS Spectra of *SM (d18:0/16:1)* in Function 1 and Function 2.
27. MS Spectra of 16:0/18:1 *phosphatidylcholine* in Function 1 and Function 2.
28. MS Spectra of 18:2/18:1 *phosphatidylcholine* in Function 1 and Function 2.

## 1. MS Spectra of Glycerophosphocholine in Function 1 and Function 2

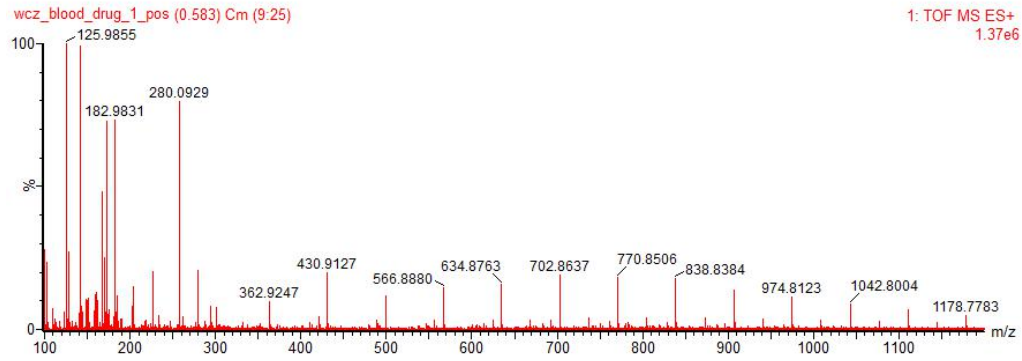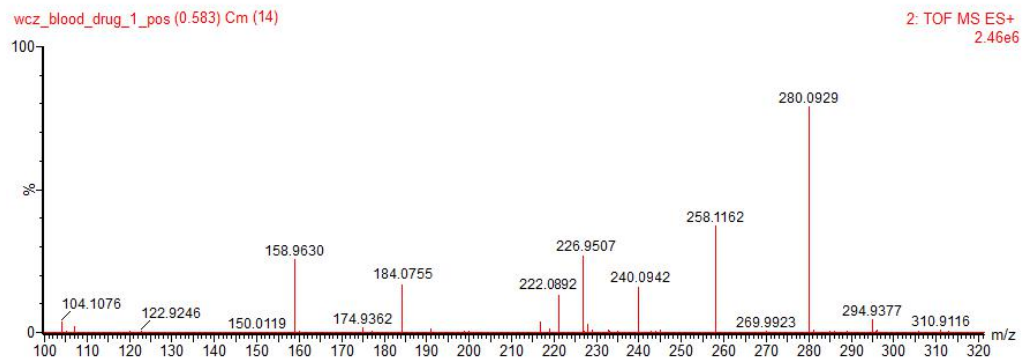

## 2. MS Spectra of Myoinositol in Function 1 and Function 2

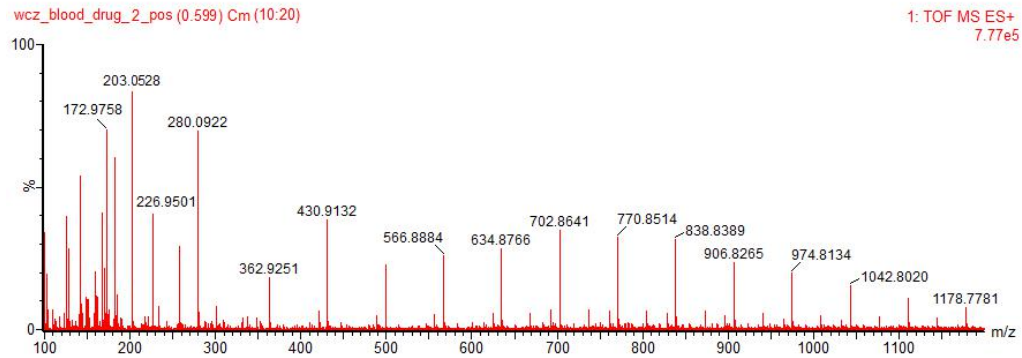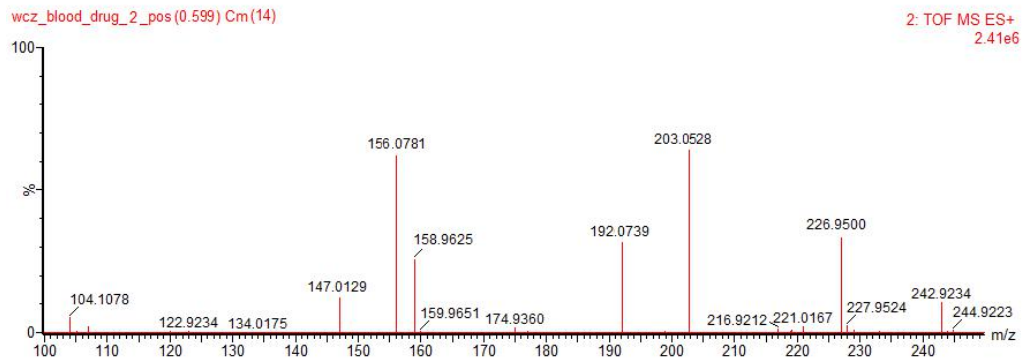

### 3. MS Spectra of $\alpha$ -Ketoglutarate in Function 1 and Function 2

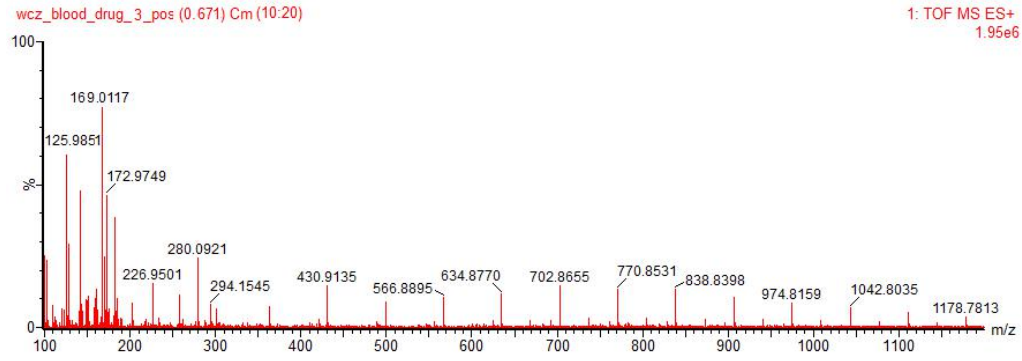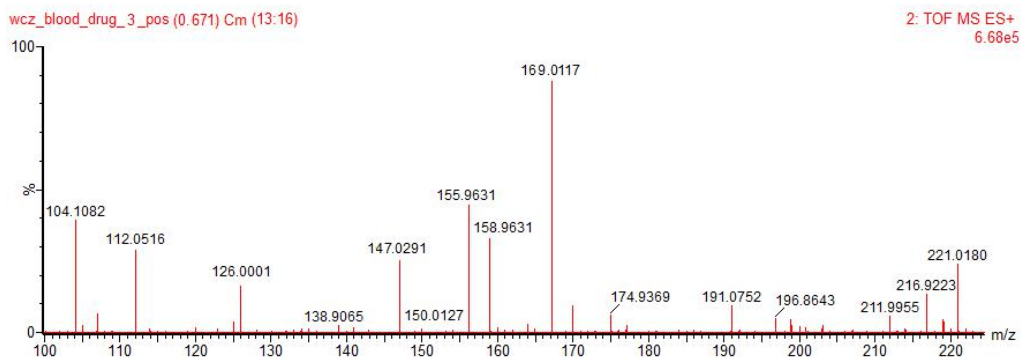

### 4. MS Spectra of Glutathione in Function 1 and Function 2

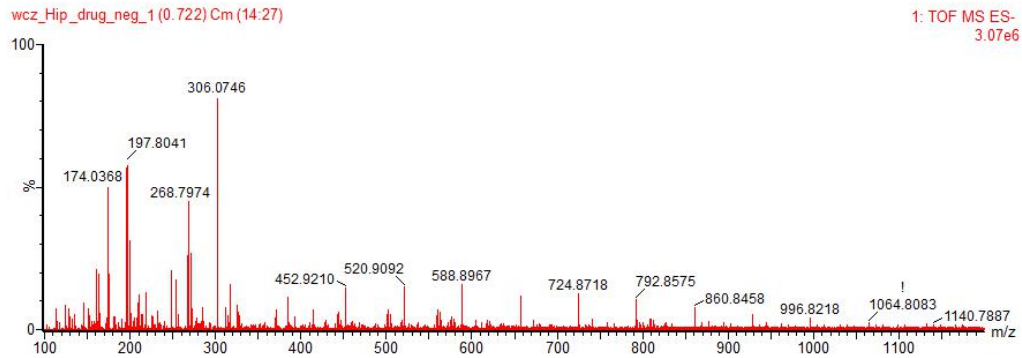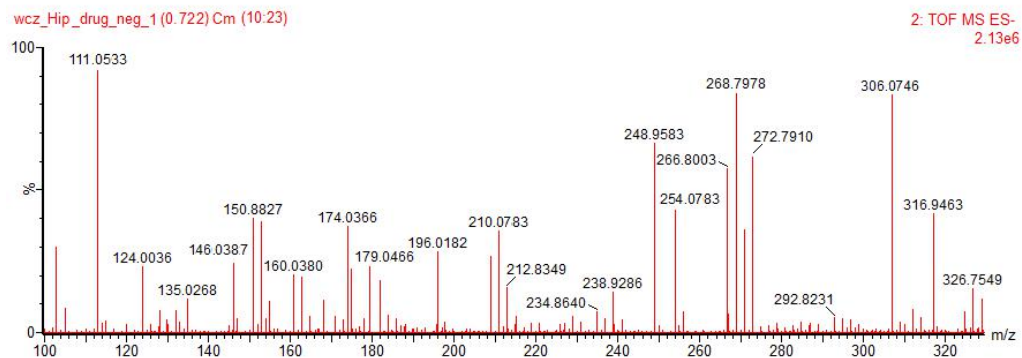

## 5. MS Spectra of Citric acid in Function 1 and Function 2

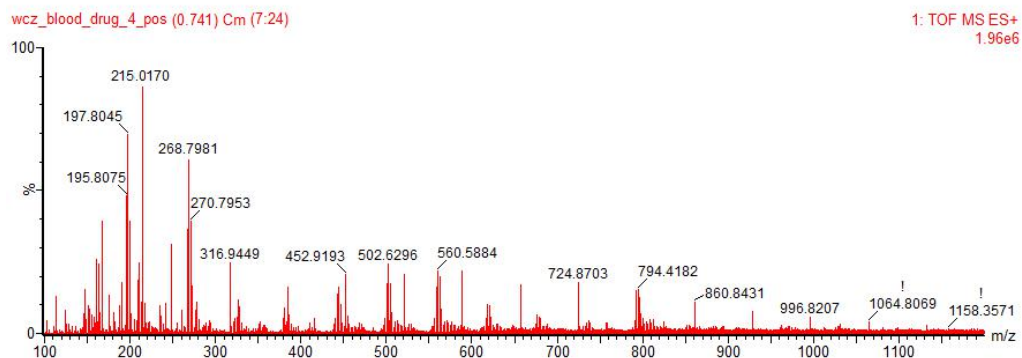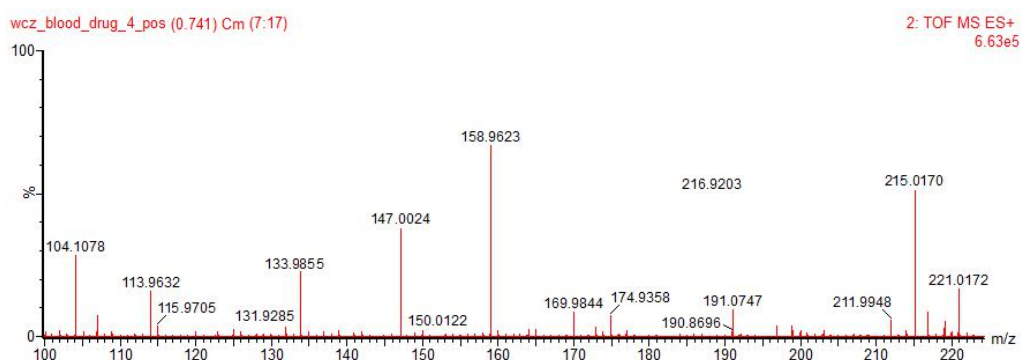

## 6. MS Spectra of Oxidized glutathione in Function 1 and Function 2

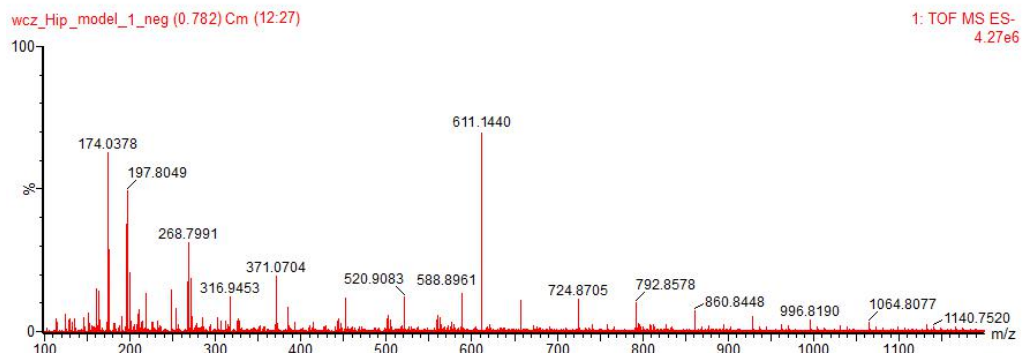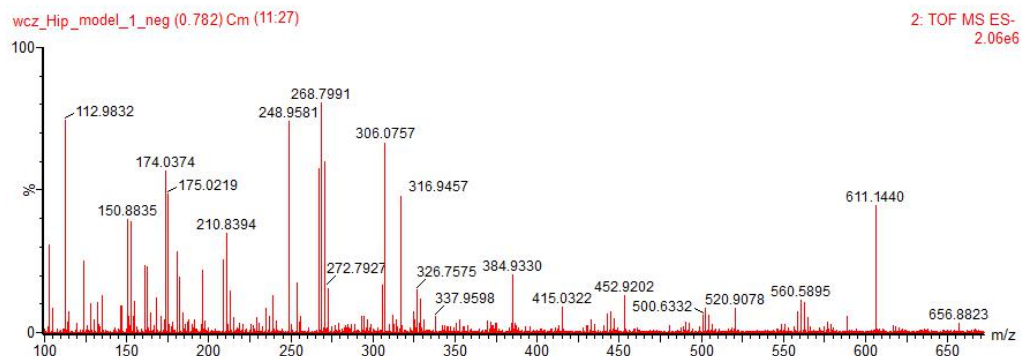



## 7. MS Spectra of Pantetheine 4'-phosphate in Function 1 and Function 2

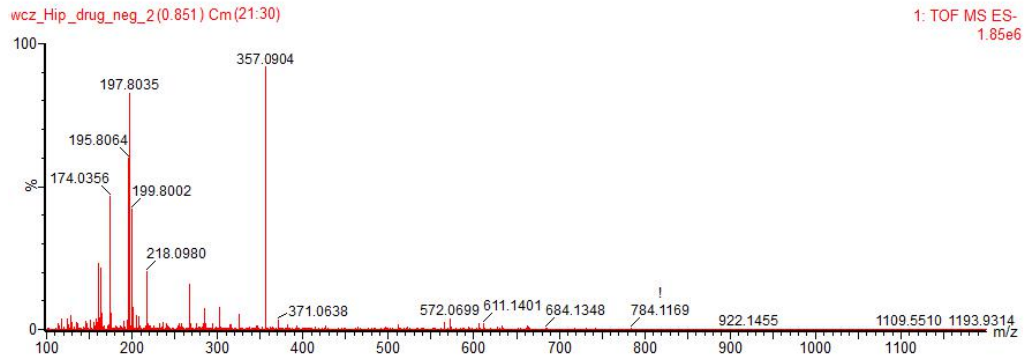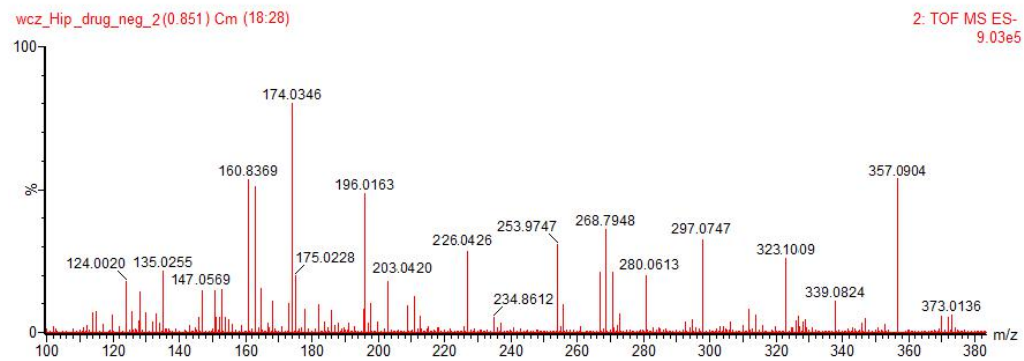

## 8. MS Spectra of Pantothenic acid in Function 1 and Function 2

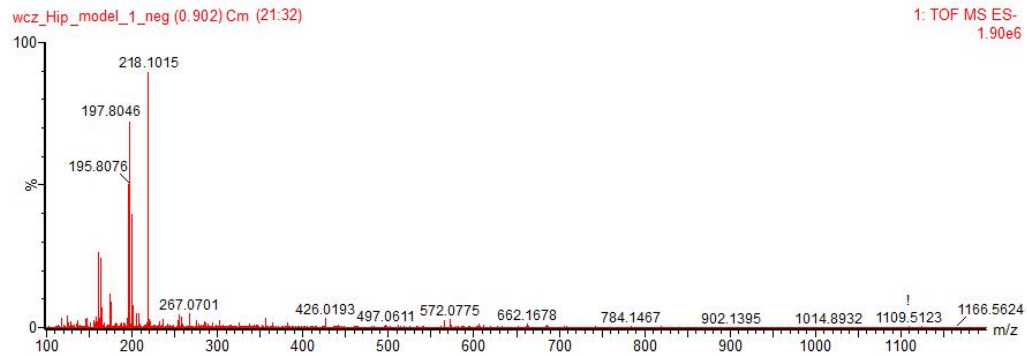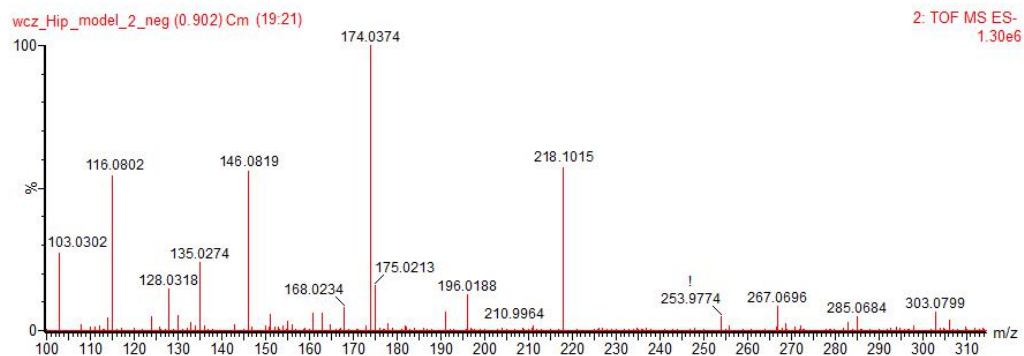

## 9. MS Spectra of L-Tryptophan in Function 1 and Function 2

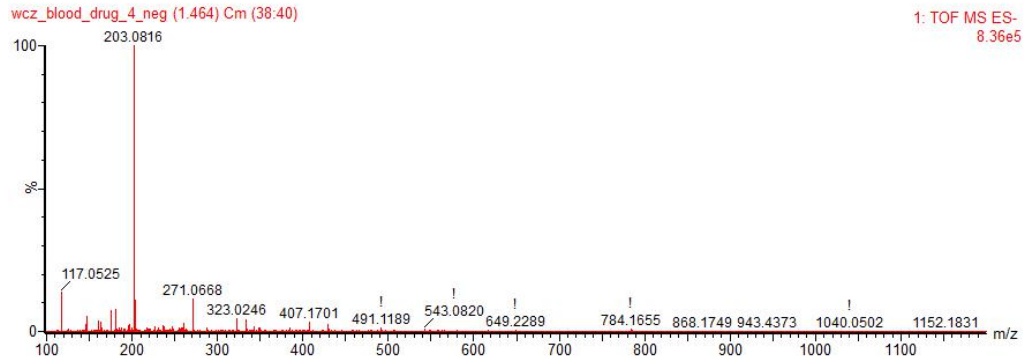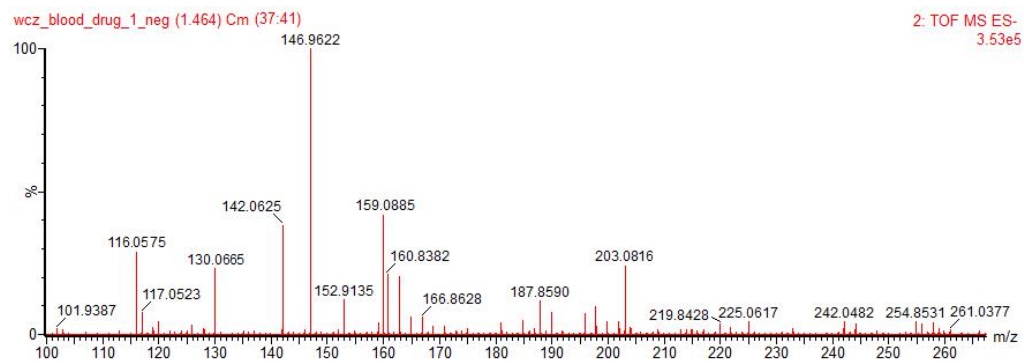

## 10. MS Spectra of Indoleacetaldehyde in Function 1 and Function 2

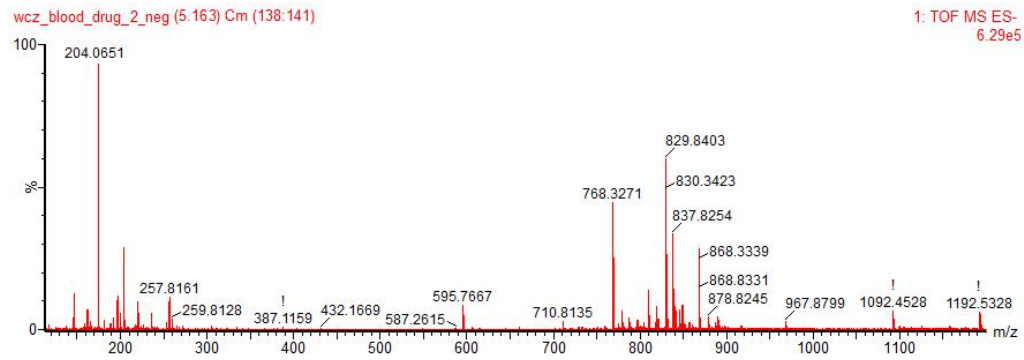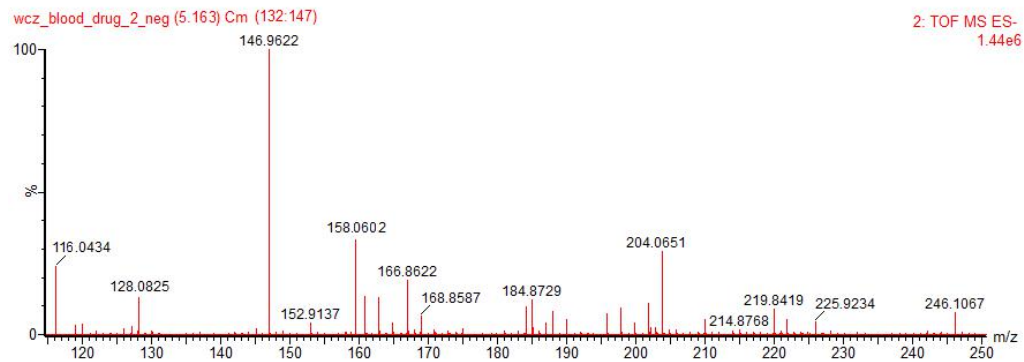

## 11. MS Spectra of Phytosphingosine in Function 1 and Function 2

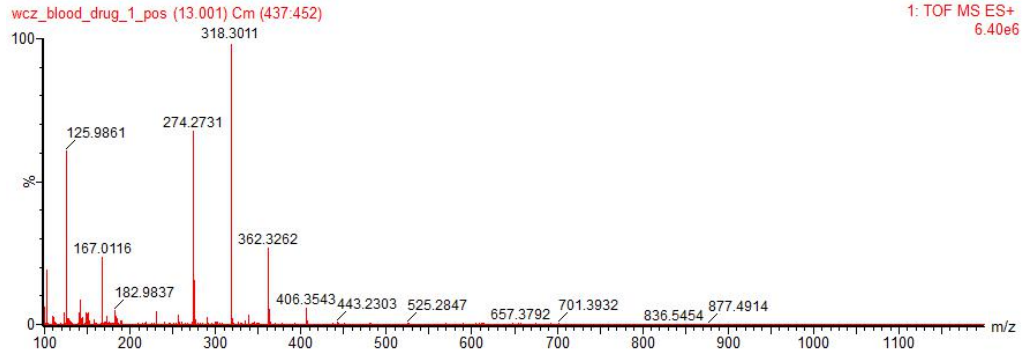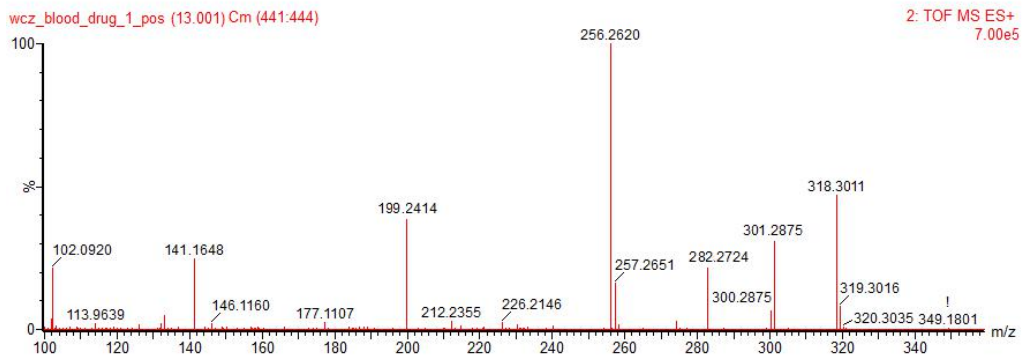

## 12. MS Spectra of Sphinganine in Function 1 and Function 2

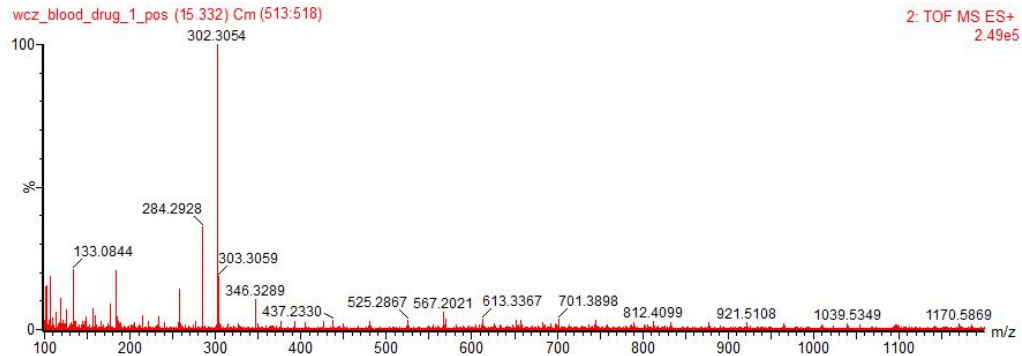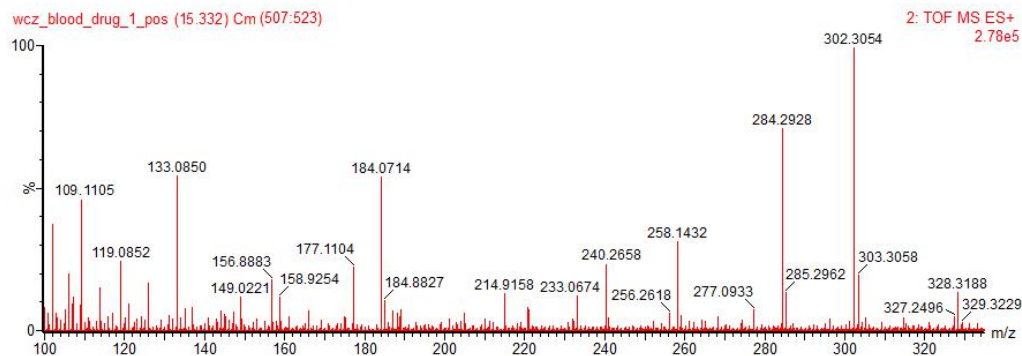

### 13. MS Spectra of Sphingosine 1-phosphate in Function 1 and Function 2

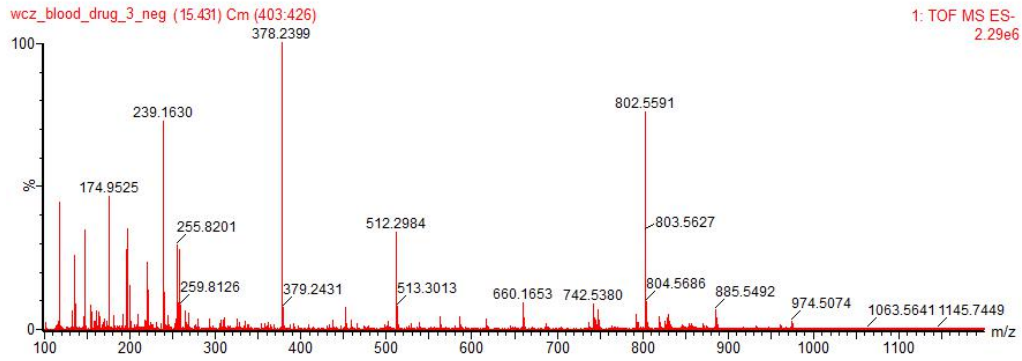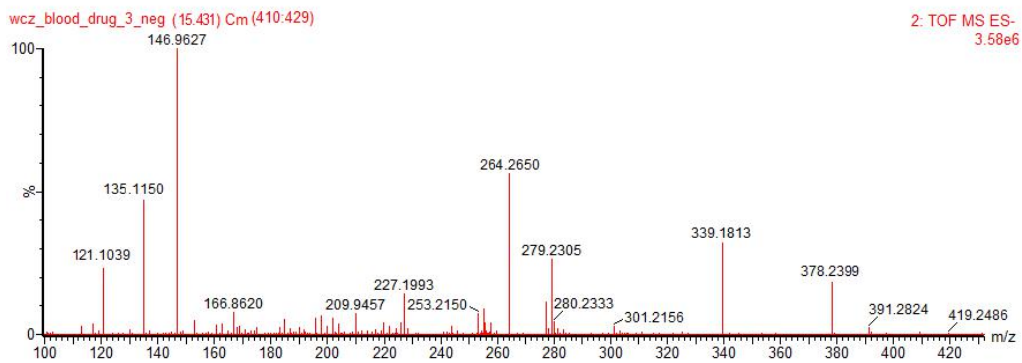

### 14. MS Spectra of Sphinganine 1-phosphate in Function 1 and Function 2

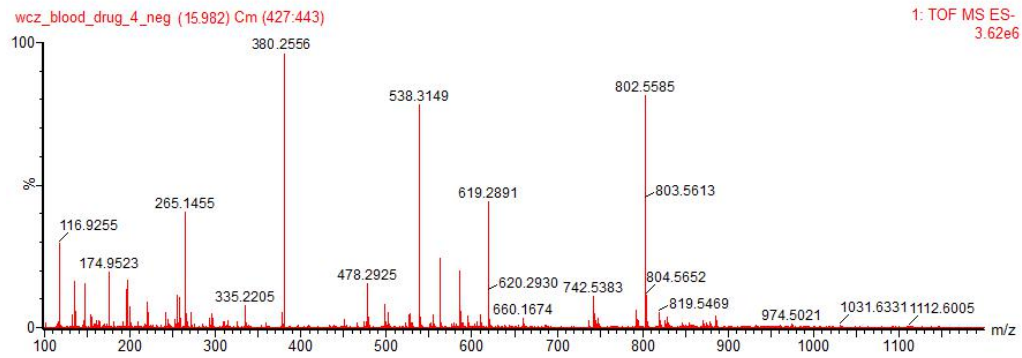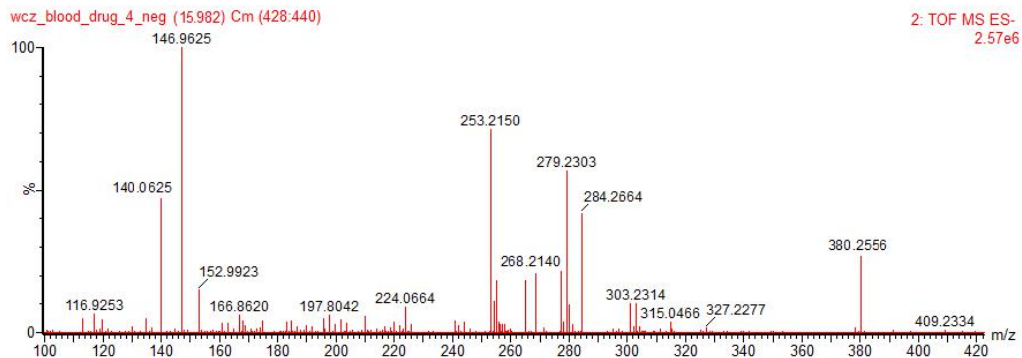

## 15. MS Spectra of Leukotriene A4 in Function 1 and Function 2

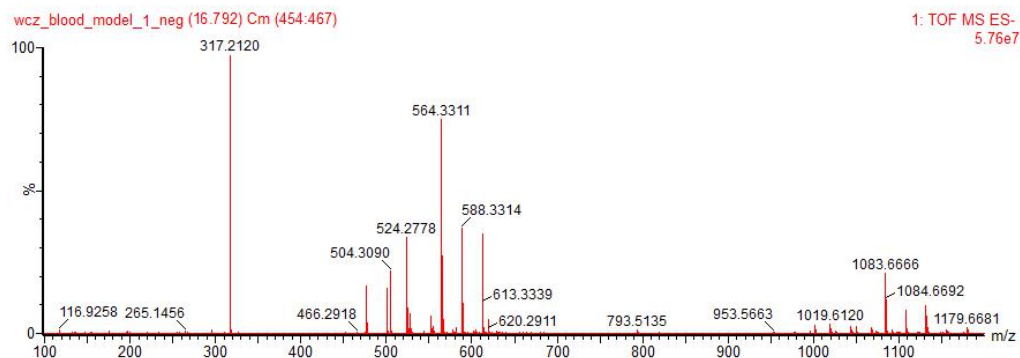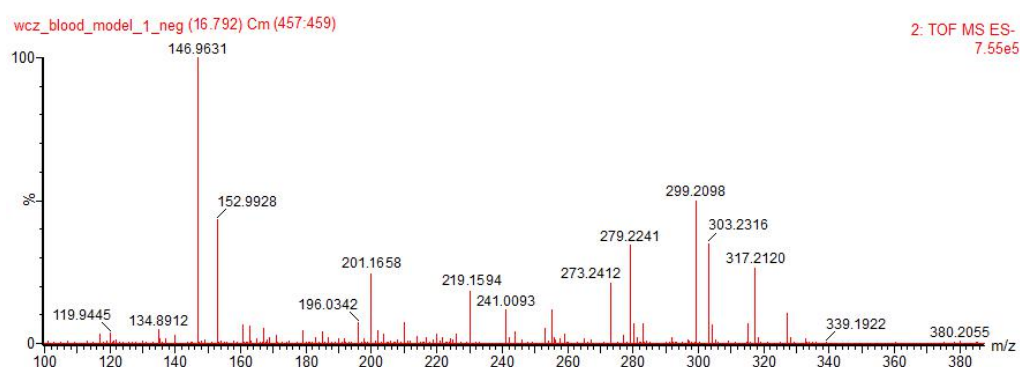

## 16. MS Spectra of 12,13-EpOME in Function 1 and Function 2

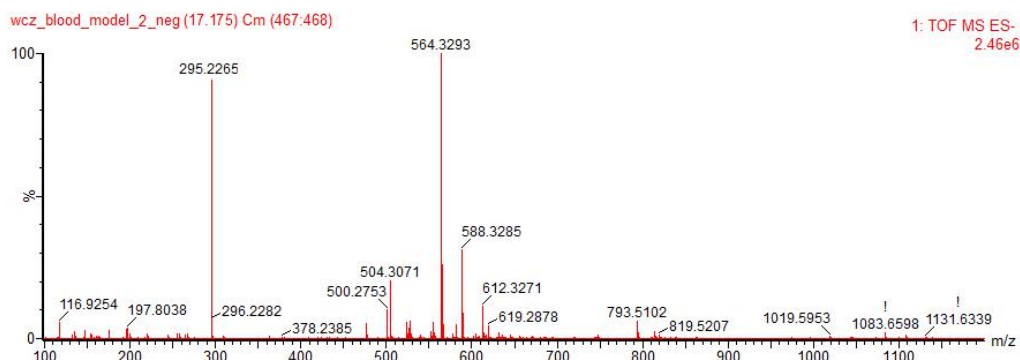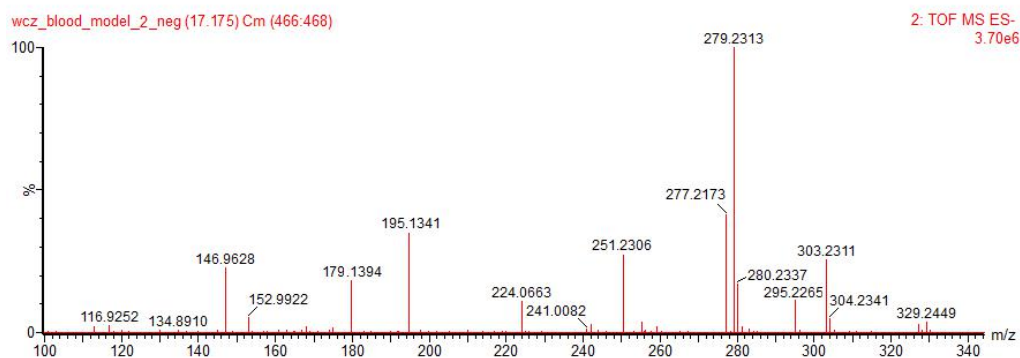

## 17. MS Spectra of 19 (S)-HETE in Function 1 and Function 2

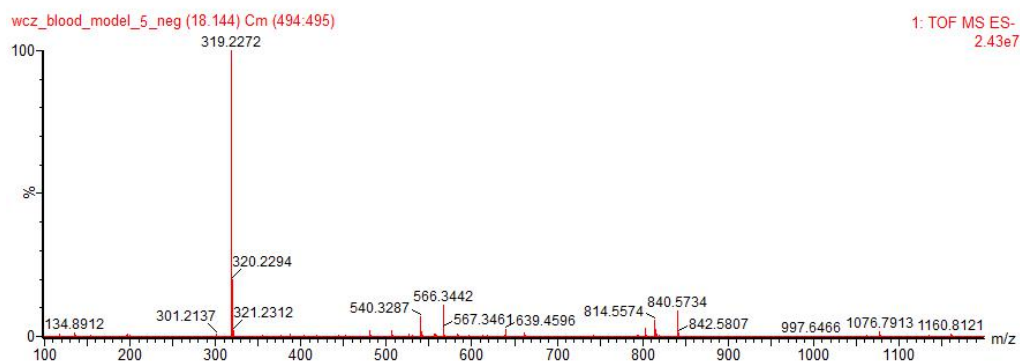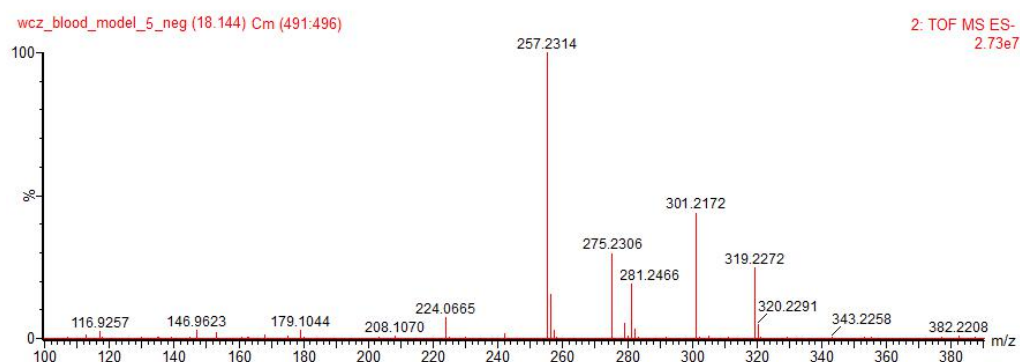

## 18. MS Spectra of LysoPC (18:1(9Z)) in Function 1 and Function 2

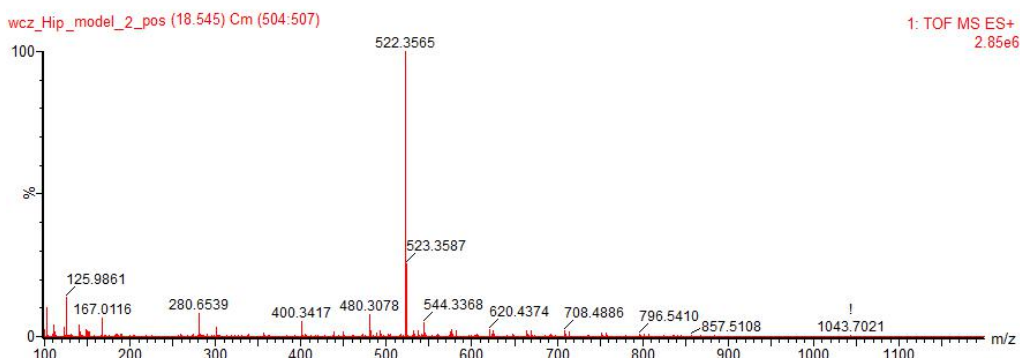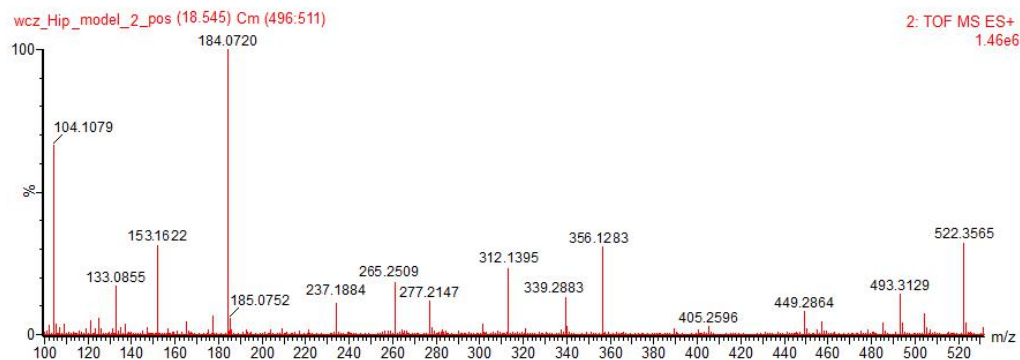

## 19. MS Spectra of 18:1/18:3 phosphatidylcholine in Function 1 and Function 2

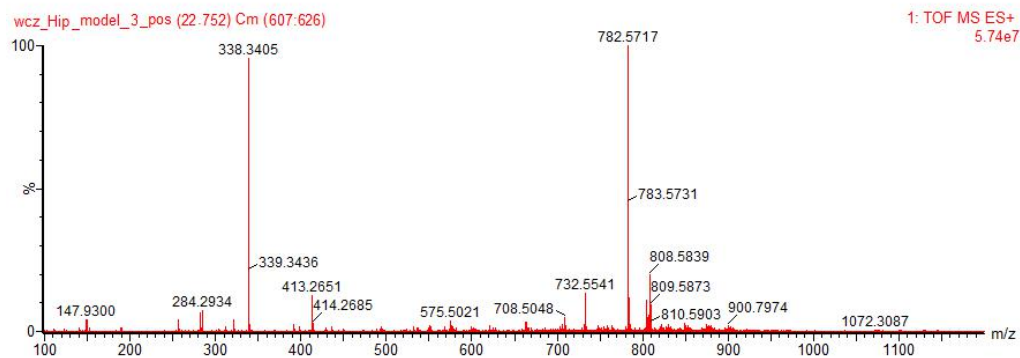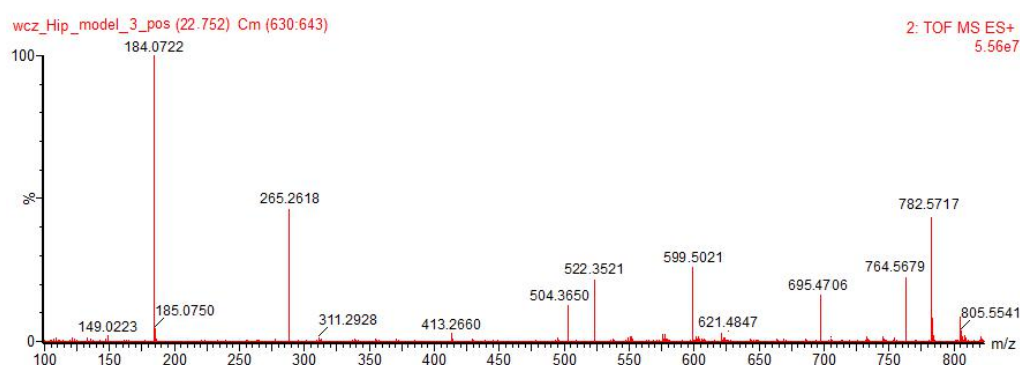

## 20. MS Spectra of Arachidonic acid in Function 1 and Function 2

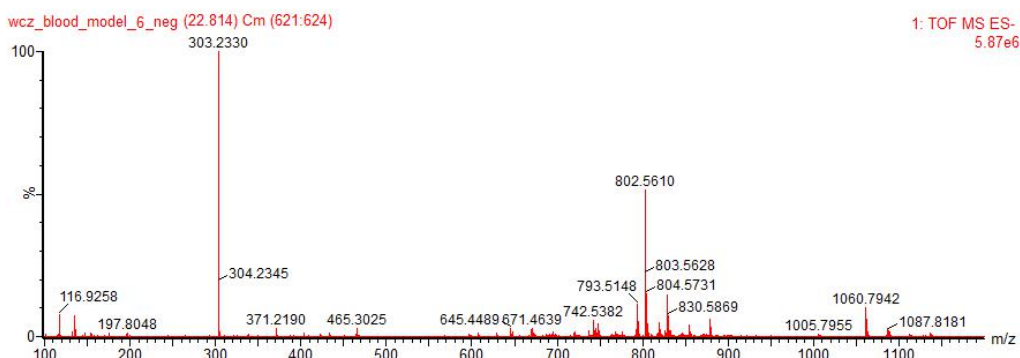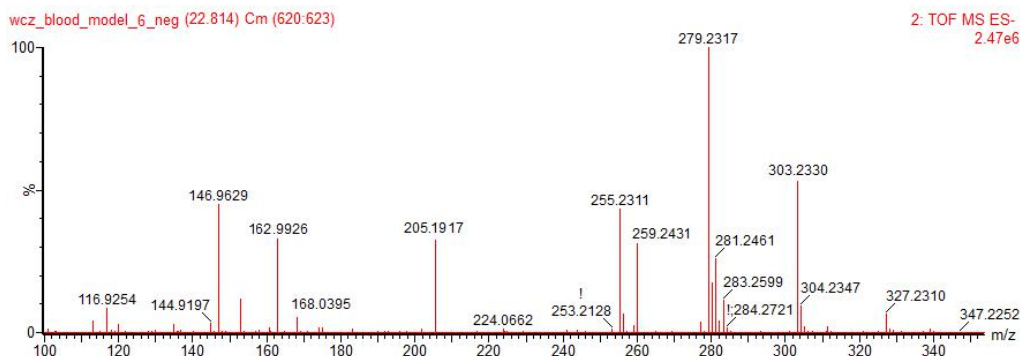

## 21. MS Spectra of Linoleic acid in Function 1 and Function 2

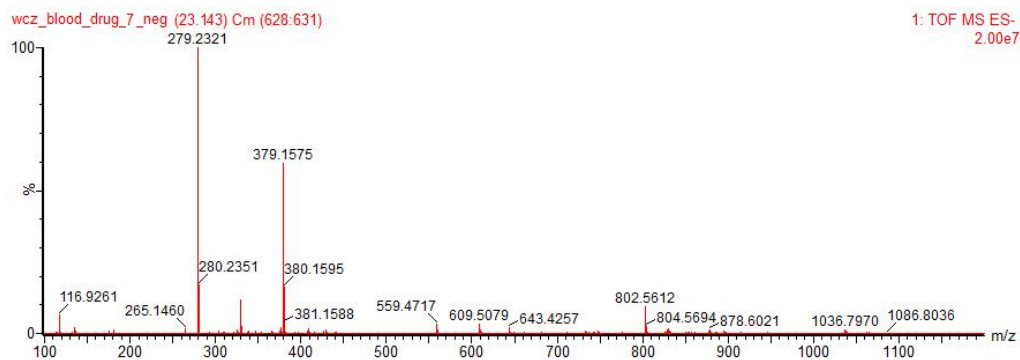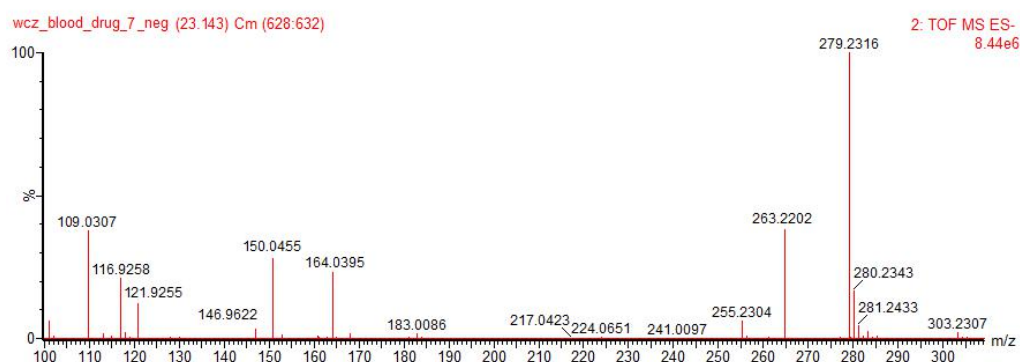

## 22. MS Spectra of 20-Hydroxy-leukotriene B4 in Function 1 and Function 2

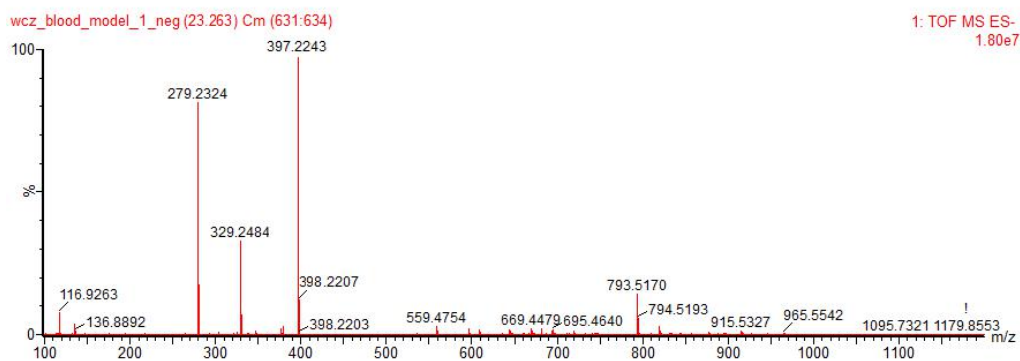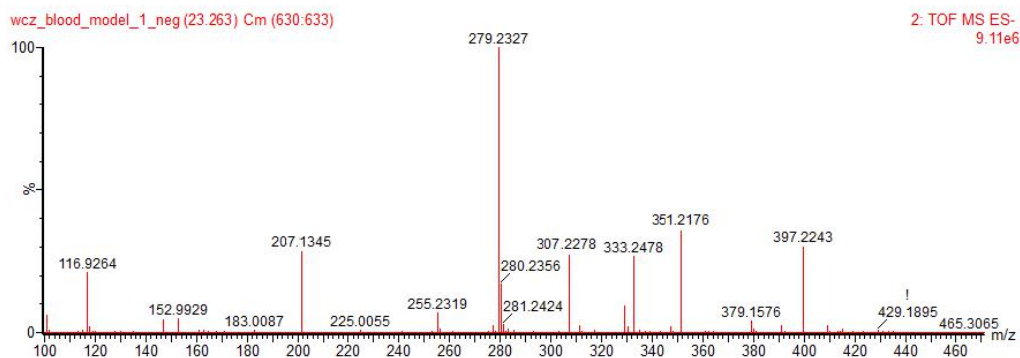



### 23. MS Spectra of 18:1/18:2 phosphatidylcholine in Function 1 and Function 2

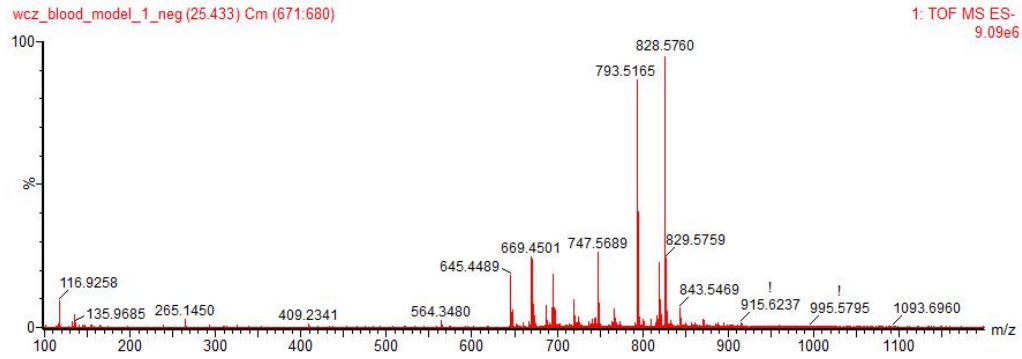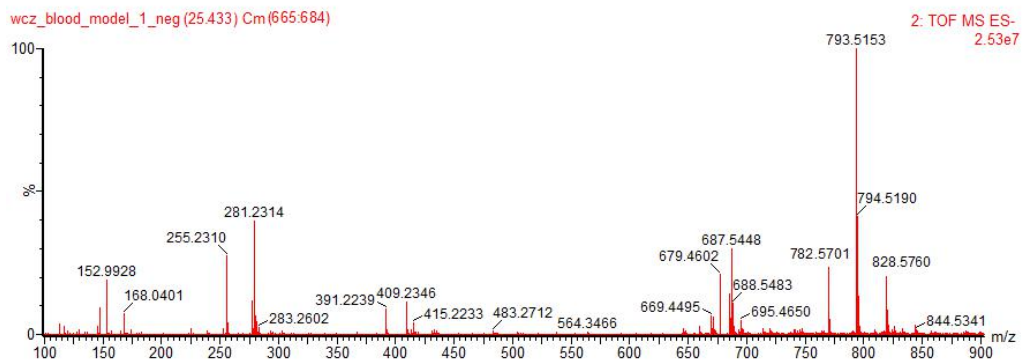

### 24. MS Spectra of Pantetheine 4'-phosphate in Function 1 and Function 2

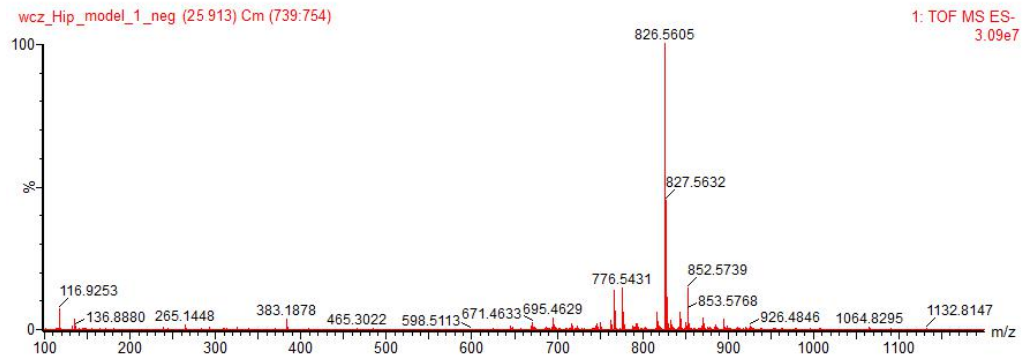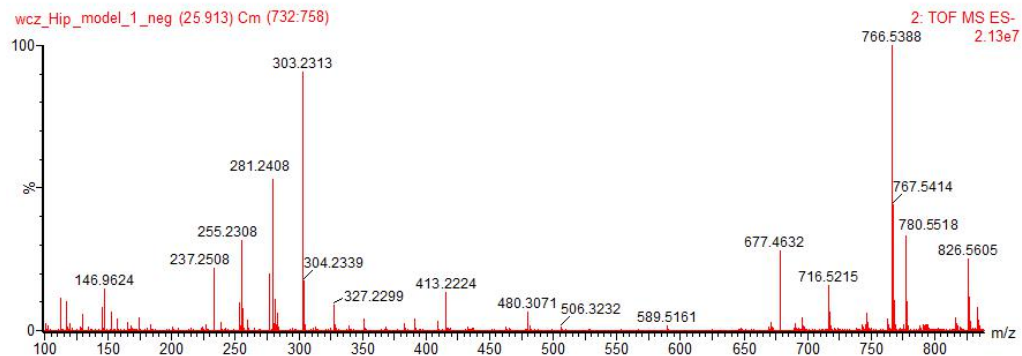

## 25. MS Spectra of Lactosylceramide in Function 1 and Function 2

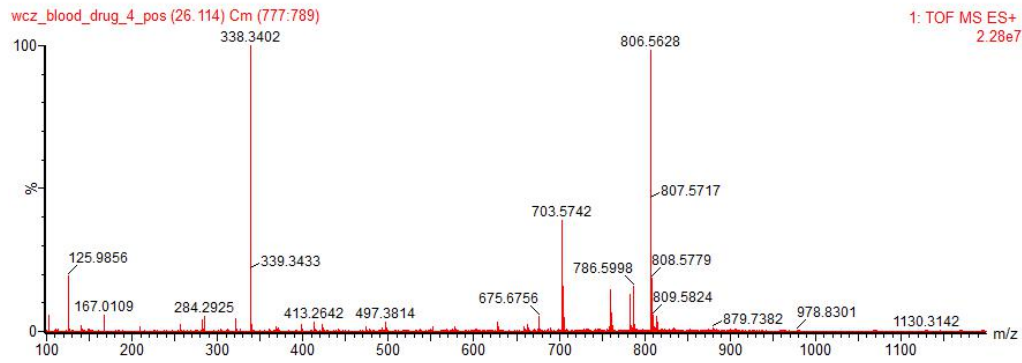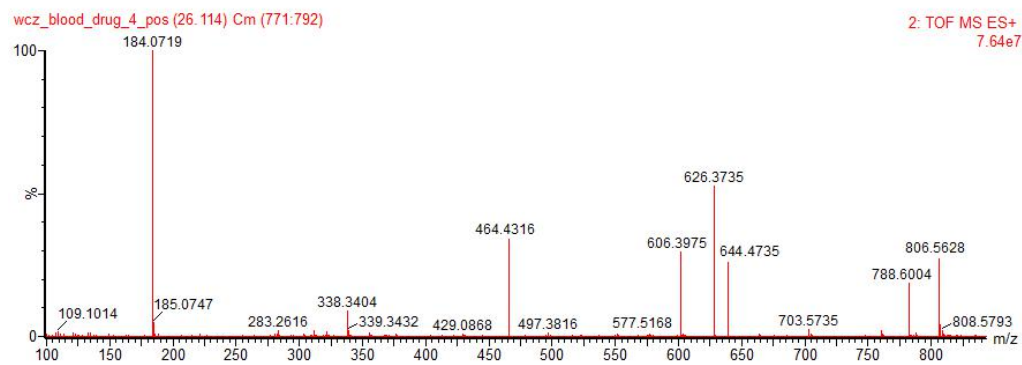

## 26. MS Spectra of 18:2/18:3 phosphatidylcholine in Function 1 and Function 2

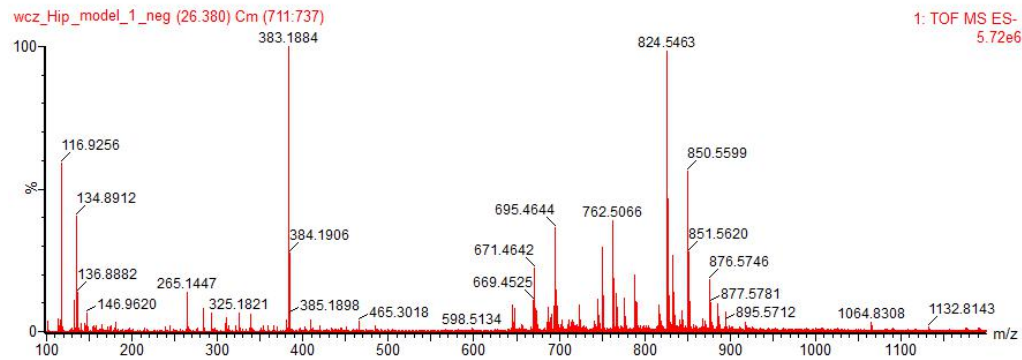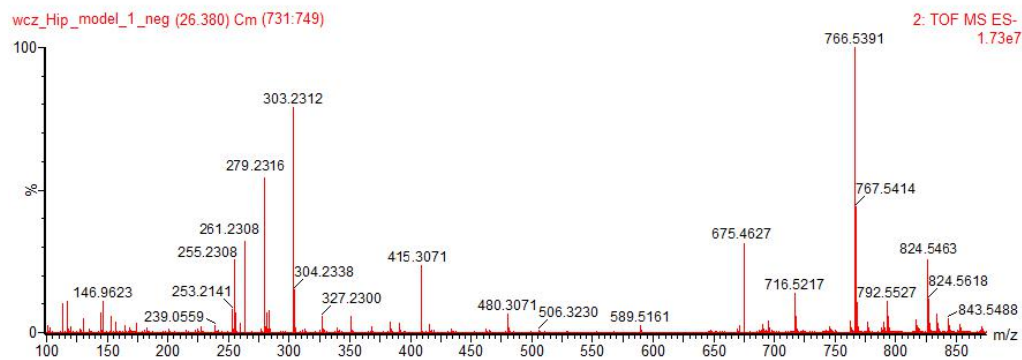

## 27. MS Spectra of SM (d18:0/16:1) in Function 1 and Function 2

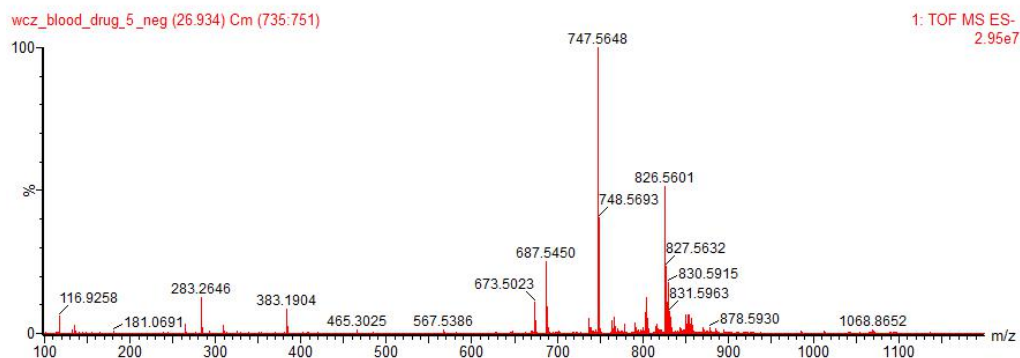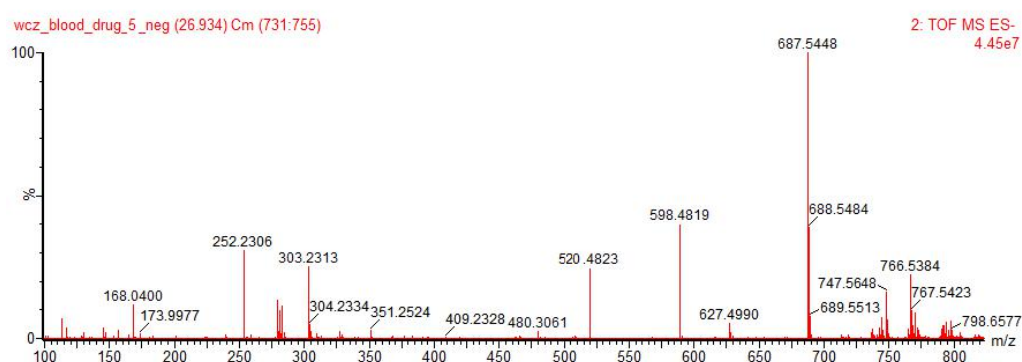

## 28. MS Spectra of 16:0/18:1 phosphatidylcholine in Function 1 and Function 2

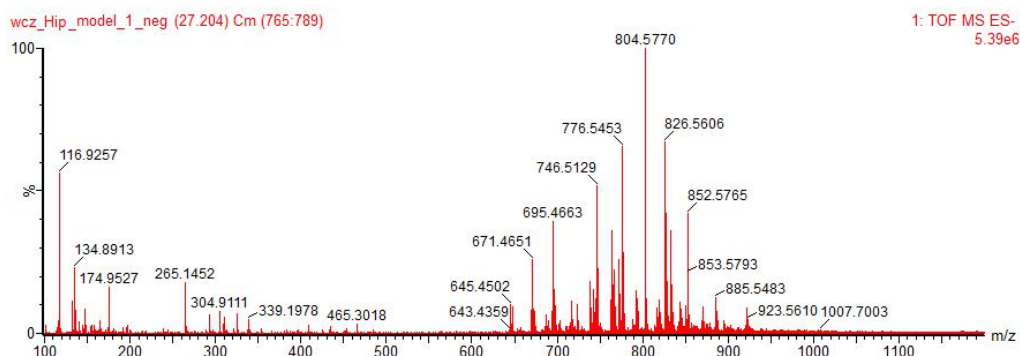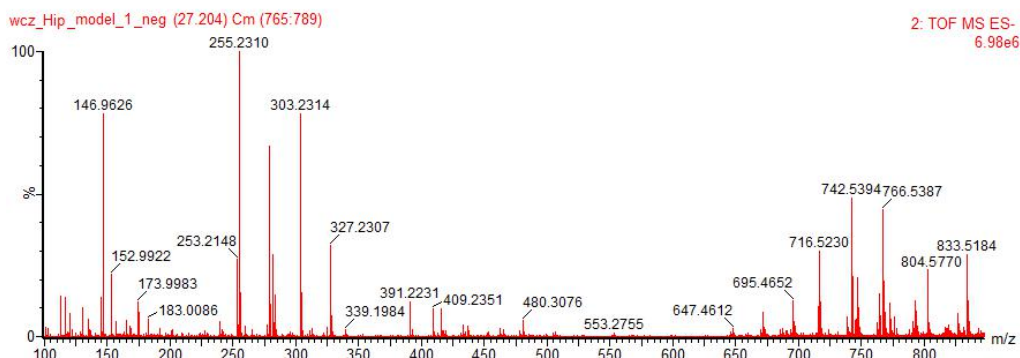

## 29. MS Spectra of 18:2/18:1 phosphatidylcholine in Function 1 and Function 2

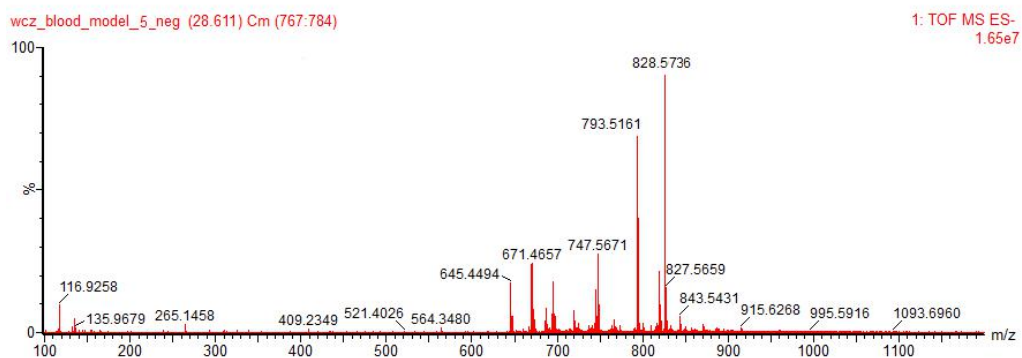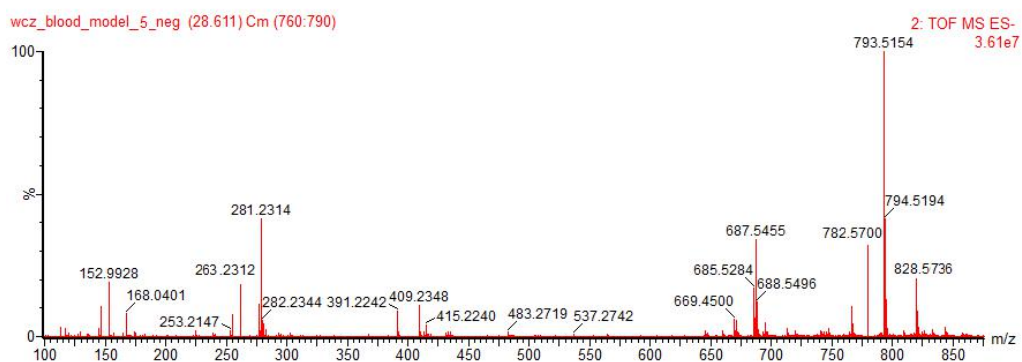

Supplement: molecules-24-01712-s001.pdf [file molecules-24-01712-s001.pdf]
